# Supplementary material for: Organometallic Ir(iii) complexes: post-synthetic modification, photophysical properties and binuclear complex construction
Source: Royal Society of Chemistry journal article supplement (doi:10.1039/d3dt00901g), 2023-01-01
Supplement: d3dt00901g2.pdf [file d3dt00901g2.pdf]

## Supporting Information

### **Organometallic Ir(III) complexes: post-synthetic modification, photophysical properties and binuclear complex construction**

Anastasia Yu. Gitlina,<sup>a</sup> Viktoria Khistiaeva,<sup>b</sup> Alexey Melnikov,<sup>c</sup> Mariia Ivonina,<sup>d</sup> Vladimir Sizov,<sup>b</sup> Dar'ya Spiridonova,<sup>e</sup> Anna Makarova,<sup>f</sup> Denis Vyalikh,<sup>j,h</sup> and Elena Grachova<sup>b\*</sup>

<sup>a</sup> Institut des Sciences et Ingénierie Chimiques, École Polytechnique Fédérale de Lausanne (EPFL), 1015 Lausanne, Switzerland

<sup>b</sup> Institute of Chemistry, St Petersburg University, Universitetskii pr. 26, 198504 St. Petersburg, Russia

<sup>c</sup> Centre for Nano- and Biotechnologies, Peter the Great St. Petersburg Polytechnic University, 195251 St. Petersburg, Russia

<sup>d</sup> Department of Material Sciences, Faculty of Engineering Sciences, Kyushu University, Kasuga, Fukuoka 816-8580, Japan

<sup>e</sup> Centre for X-ray Diffraction Studies, St Petersburg University, 199034 St. Petersburg, Russia

<sup>f</sup> Physikalische Chemie, Institut für Chemie und Biochemie, Freie Universität Berlin, 14195 Berlin, Germany

<sup>j</sup> Donostia International Physics Center (DIPC), 20018 Donostia-San Sebastián, Basque Country, Spain

<sup>h</sup> IKERBASQUE, Basque Foundation for Science, 48013, Bilbao, Spain

Correspondence: [e.grachova@spbu.ru](mailto:e.grachova@spbu.ru)

## Content

|                                                                                                                                                                                                                             |    |
|-----------------------------------------------------------------------------------------------------------------------------------------------------------------------------------------------------------------------------|----|
| Content .....                                                                                                                                                                                                               | 2  |
| <b>Scheme S1.</b> Abbreviations of C <sup>N</sup> and N <sup>N</sup> ligands.....                                                                                                                                           | 5  |
| <b>Scheme S2.</b> Synthesis of the boronic ether <b>Bpinpbpy</b> . <i>i</i> = KOAc, DMSO; <i>ii</i> = Pd(PPh <sub>3</sub> ) <sub>4</sub> , 80°C, overnight.....                                                             | 5  |
| Synthesis of 5-(4-(4,4,5,5-tetramethyl-1,3,2-dioxaborolan-2-yl)phenyl)-2,2'-bipyridine, <b>Bpinpbpy</b> .....                                                                                                               | 5  |
| <b>Table S1.</b> Crystal data and structure refinement for <b>8</b> .....                                                                                                                                                   | 6  |
| <b>Table S2.</b> Selected structural parameters for <b>8</b> .....                                                                                                                                                          | 7  |
| <b>Figure S1.</b> ESI <sup>+</sup> MS spectra of <b>Bpinpbpy</b> with simulated isotope pattern of key signal. ....                                                                                                         | 8  |
| <b>Figure S2.</b> <sup>1</sup> H NMR spectra of <b>Bpinpbpy</b> , aromatic range, acetone-d <sub>6</sub> , r.t. ....                                                                                                        | 8  |
| <b>Figure S3.</b> ESI <sup>+</sup> MS spectra of complexes <b>4–6</b> with simulated isotope pattern of key signal....                                                                                                      | 9  |
| <b>Figure S4.</b> ESI <sup>+</sup> MS spectra of complexes <b>7–9</b> with simulated isotope pattern of key signal..                                                                                                        | 10 |
| <b>Figure S5.</b> <sup>1</sup> H and <sup>1</sup> H <sup>1</sup> H COSY NMR spectra of <b>4</b> , aromatic range, acetone-d <sub>6</sub> , r.t. ....                                                                        | 11 |
| <b>Figure S6.</b> <sup>1</sup> H and <sup>1</sup> H <sup>1</sup> H COSY NMR spectra of <b>5</b> , aromatic range, acetone-d <sub>6</sub> , r.t. ....                                                                        | 12 |
| <b>Figure S7.</b> <sup>1</sup> H and <sup>1</sup> H <sup>1</sup> H COSY NMR spectra of <b>6</b> , aromatic range, acetone-d <sub>6</sub> , r.t. ....                                                                        | 13 |
| <b>Figure S8.</b> <sup>1</sup> H and <sup>1</sup> H <sup>1</sup> H COSY NMR spectra of <b>7</b> , aromatic range, acetone-d <sub>6</sub> , r.t. ....                                                                        | 14 |
| <b>Figure S9.</b> <sup>1</sup> H and <sup>1</sup> H <sup>1</sup> H COSY NMR spectra of <b>8</b> , aromatic range, acetone-d <sub>6</sub> , r.t. ....                                                                        | 15 |
| <b>Figure S10.</b> <sup>1</sup> H and <sup>1</sup> H <sup>1</sup> H COSY NMR spectra of <b>9</b> , aromatic range, acetone-d <sub>6</sub> , r.t. ....                                                                       | 16 |
| <b>Figure S11.</b> DFT-optimized structures of the complexes <b>4–6</b> . ....                                                                                                                                              | 17 |
| <b>Figure S12.</b> DFT-optimized structures of the complexes <b>7–9</b> . ....                                                                                                                                              | 18 |
| <b>Figure S13.</b> DFT-optimized structures of binuclear complexes <b>10</b> and <b>11<sup>Ln</sup></b> (Ln = Nd, Gd, Yb). ....                                                                                             | 19 |
| <b>Figure S14.</b> Visualization of molecular arrangement in <b>8</b> crystal. Anions [PF <sub>6</sub> ] <sup>-</sup> are not shown. Colour legend: carbon – grey, nitrogen – sky blue, iridium – orange, hydrogen – white. | 20 |
| <b>Figure S15.</b> <sup>1</sup> H and <sup>1</sup> H <sup>1</sup> H COSY NMR spectra of <b>10</b> , aromatic range, acetone-d <sub>6</sub> , r.t. ....                                                                      | 21 |
| <b>Figure S16.</b> ESI <sup>+</sup> MS spectra of <b>10</b> with simulated isotope pattern of key signal corresponding to binuclear composition.....                                                                        | 22 |
| <b>Figure S17.</b> FTIR spectra of <b>11<sup>Ln</sup></b> , KBr pellet, r.t.....                                                                                                                                            | 22 |

|                    |                                                                                                                                                                                                                                                                      |    |
|--------------------|----------------------------------------------------------------------------------------------------------------------------------------------------------------------------------------------------------------------------------------------------------------------|----|
| <b>Figure S18.</b> | High-resolution N 1s XPS spectra of <b>6</b> and <b>11<sup>Ln</sup></b> .....                                                                                                                                                                                        | 23 |
| <b>Figure S19.</b> | Deconvolution of the emission spectrum of <b>10</b> into two independent bands; (a) aerated DCE solution, (b) deaerated DCE solution, (c) difference between native emission band of <b>6</b> and emission band used for deconvolution {Ir(pybt) <sub>2</sub> }..... | 24 |
| <b>Figure S20.</b> | CIE 1931 coordinates for <b>10</b> (A = aerated, D = de-aerated) in solution, DCE, r.t. .<br>.....                                                                                                                                                                   | 25 |
| <b>Figure S21.</b> | UV-vis spectra of <b>4</b> , <b>6</b> and <b>10</b> (left) and normalized excitation spectra of <b>10</b> (right), DCE solution, r.t.....                                                                                                                            | 25 |
| <b>Figure S22.</b> | Comparison of solid-state emission of <b>6</b> and <b>11<sup>Gd</sup></b> at variable temperature with emission of <b>6</b> in DCE solution.....                                                                                                                     | 26 |
| <b>Table S3.</b>   | Optical and photophysical properties of <b>11<sup>Ln</sup></b> (Ln = Nd, Gd, Yb) complexes .....                                                                                                                                                                     | 26 |
| <b>Table S4.</b>   | The energy of f→f transitions of Nd(III) from the <sup>4</sup> I <sub>9/2</sub> ground state between <sup>4</sup> F <sub>3/2</sub> .(emissive level) and <sup>2</sup> G <sub>7/2</sub> level. <sup>2</sup> .....                                                     | 26 |
| <b>Figure S23.</b> | Fragment decomposition of complexes used for excited state population analysis.<br>.....                                                                                                                                                                             | 27 |
| <b>Figure S24.</b> | TDDFT spectra of <b>4–6</b> . Singlets with <i>f</i> > 0.1 are indicated. Experimental spectra are given for comparison. ....                                                                                                                                        | 28 |
| <b>Figure S25.</b> | TDDFT spectra of <b>7–9</b> . Singlets with <i>f</i> > 0.1 are indicated. Experimental spectra are given for comparison. ....                                                                                                                                        | 29 |
| <b>Table S5.</b>   | Natural Transition Orbital analysis of <b>singlets</b> with oscillator strength <i>f</i> > 0.1 in <b>4–9</b> .<br>.....                                                                                                                                              | 30 |
| <b>Figure S26.</b> | Excited state diagrams for <b>4–9</b> obtained from TDDFT calculations.....                                                                                                                                                                                          | 37 |
| <b>Table S6.</b>   | Natural Transition Orbital analysis of <b>first triplets</b> in <b>4–9</b> .....                                                                                                                                                                                     | 38 |
| <b>Figure S27.</b> | TDDFT spectra of <b>10</b> . Singlets with <i>f</i> > 0.1 are indicated. Experimental spectra are given for comparison. ....                                                                                                                                         | 39 |
| <b>Table S7.</b>   | Natural Transition Orbital analysis of <b>singlets</b> with oscillator strength <i>f</i> > 0.1 in complex <b>10</b> . ....                                                                                                                                           | 39 |
| <b>Figure S28.</b> | Excited state diagrams for <b>10</b> obtained from TDDFT calculations. Degenerated T <sub>2</sub> and T <sub>3</sub> states located on pybt ligands and T <sub>4</sub> state located on N <sup>^</sup> N ligand are indicated.....                                   | 41 |
| <b>Table S8.</b>   | Natural Transition Orbital analysis of <b>low-energy excited states</b> in complex <b>10</b> . ..                                                                                                                                                                    | 41 |

|                                                                                                                                                                                 |    |
|---------------------------------------------------------------------------------------------------------------------------------------------------------------------------------|----|
| <b>Figure S29.</b> TDDFT spectra of <b>11<sup>Ln</sup></b> (Ln = Nd, Gd, Yb). Singlets with $f > 0.1$ are indicated. Experimental spectra are given for comparison. ....        | 43 |
| <b>Table S9.</b> Natural Transition Orbital analysis of <b>singlets</b> with oscillator strength $f > 0.1$ in <b>11<sup>Ln</sup></b> (Ln = Nd, Gd, Yb). ....                    | 44 |
| <b>Figure S30.</b> Excited state diagrams for <b>11<sup>Ln</sup></b> (Ln = Nd, Gd, Yb) obtained from TDDFT calculations. Energy levels of lanthanides are shown in colour. .... | 50 |
| <b>Table S10.</b> Natural Transition Orbital analysis of <b>first triplets</b> in <b>11<sup>Ln</sup></b> (Ln = Nd, Gd, Yb). ...                                                 | 51 |
| References .....                                                                                                                                                                | 51 |

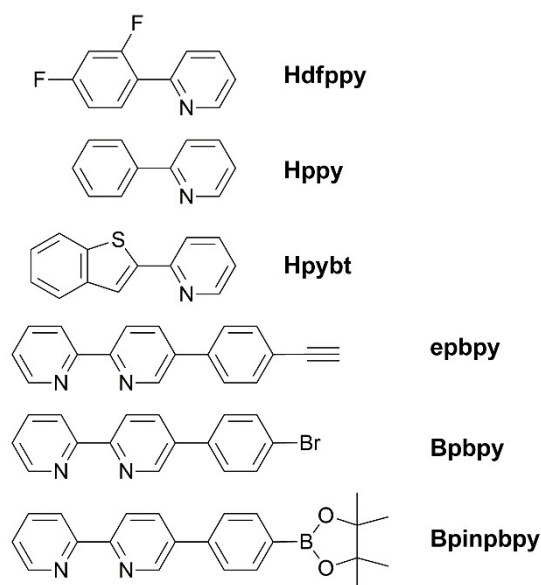

**Scheme S1.** Abbreviations of C<sup>N</sup> and N<sup>N</sup> ligands.

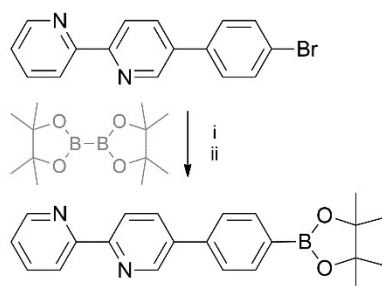

**Scheme S2.** Synthesis of the boronic ether **Bpinpbpy**. *i* = KOAc, DMSO; *ii* = Pd(PPh<sub>3</sub>)<sub>4</sub>, 80°C, overnight.

### Synthesis of 5-(4-(4,4,5,5-tetramethyl-1,3,2-dioxaborolan-2-yl)phenyl)-2,2'-bipyridine, **Bpinpbpy**

5-(4-bromophenyl)-2,2'-bipyridine (**Bpbpy**) was synthesized according to the published procedure.<sup>1</sup> Bis(pinacolato)diboron was purchased from Aldrich/Merck and used without further purification. **Bpbpy** (500 mg, 1.61 mmol, 1 equiv.), bis(pinacolato)diboron (816 mg, 3.22 mmol, 2 equiv.) and KOAc (473 mg, 4.82 mmol, 3 equiv.) were mixed and dissolved in 30 ml of degassed DMSO. Then Pd(PPh<sub>3</sub>)<sub>4</sub> (5 mol. %, 93.1 mg, 0.08 mmol) was added, and the reaction mixture was stirring overnight at 80 °C. After cooling to room temperature the reaction mixture was diluted with water, and the product was extracted by EtOAc three times. EtOAc layer was washed twice with water and brine and dried over anhydrous MgSO<sub>4</sub>. The filtrate was evaporated, and the crude was washed with Et<sub>2</sub>O. The boronic ether **Bpinpbpy** was dried under reduced pressure resulting in a pale yellow crystalline precipitate. Yield: 486 mg (84 %). <sup>1</sup>H NMR (400 MHz, (CD<sub>3</sub>)<sub>2</sub>CO, 298 K): δ 9.01 (d, *J* = 1.9 Hz, 1H, pyridine ring), 8.75 – 8.66 (m, 1H, pyridine ring), 8.58 (d, *J* =

8.3 Hz, 1H, pyridine ring), 8.53 (d,  $J = 8.0$  Hz, 1H, pyridine ring), 8.23 (dd,  $J = 8.3, 2.4$  Hz, 1H, pyridine ring), 7.98 – 7.87 (m, 1H, pyridine ring), 7.86 – 7.78 (m, 2H, phenyl ring), 7.82 (d,  $J = 8.3$  Hz, 2H, phenyl ring), 7.43 (ddd,  $J = 7.5, 4.8, 1.0$  Hz, 1H), 1.37 (s, 12H, CH<sub>3</sub>). HRMS (ESI/QTOF)  $m/z$ :  $[M+H]^+$  calculated for  $[C_{22}H_{24}BN_2O_2]^+$  359.1932, found 359.1939. Elem. anal. calculated for C<sub>22</sub>H<sub>23</sub>BN<sub>2</sub>O<sub>2</sub>: C 73.76; H 6.47; N 7.82. Found: C 73.54; H 6.45; N 7.86.

**Table S1.** Crystal data and structure refinement for **8**

|                                               |                                                                                  |
|-----------------------------------------------|----------------------------------------------------------------------------------|
| Identification code                           | 12309_vk281_sq                                                                   |
| Empirical formula                             | C <sub>92</sub> H <sub>68</sub> F <sub>6</sub> Ir <sub>2</sub> N <sub>16</sub> P |
| Formula weight                                | 1926.99                                                                          |
| Temperature/K                                 | 99.99(13)                                                                        |
| Crystal system                                | monoclinic                                                                       |
| Space group                                   | I2/a                                                                             |
| $a/\text{\AA}$                                | 42.9654(2)                                                                       |
| $b/\text{\AA}$                                | 33.9313(2)                                                                       |
| $c/\text{\AA}$                                | 15.77980(10)                                                                     |
| $\alpha/^\circ$                               | 90                                                                               |
| $\beta/^\circ$                                | 96.7680(10)                                                                      |
| $\gamma/^\circ$                               | 90                                                                               |
| Volume/ $\text{\AA}^3$                        | 22844.6(2)                                                                       |
| $Z$                                           | 8                                                                                |
| $\rho_{calc}$ g/cm <sup>3</sup>               | 1.121                                                                            |
| $\mu/\text{mm}^{-1}$                          | 4.999                                                                            |
| F(000)                                        | 7640.0                                                                           |
| Crystal size/mm <sup>3</sup>                  | 0.2 × 0.16 × 0.1                                                                 |
| Radiation                                     | Cu K $\alpha$ ( $\lambda = 1.54184$ )                                            |
| $2\theta$ range for data collection/ $^\circ$ | 4.142 to 140                                                                     |
| Index ranges                                  | $-51 \leq h \leq 52, -41 \leq k \leq 38, -19 \leq l \leq 19$                     |
| Reflections collected                         | 119978                                                                           |
| Independent reflections                       | 21648 [ $R_{int} = 0.0495, R_{sigma} = 0.0292$ ]                                 |
| Data/restraints/parameters                    | 21648/3/1097                                                                     |
| Goodness-of-fit on $F^2$                      | 1.046                                                                            |
| Final $R$ indexes [ $I \geq 2\sigma(I)$ ]     | $R_1 = 0.0344, wR_2 = 0.0947$                                                    |
| Final $R$ indexes [all data]                  | $R_1 = 0.0359, wR_2 = 0.0964$                                                    |
| Largest diff. peak/hole / e $\text{\AA}^{-3}$ | 1.70/−1.60                                                                       |
| CCDC Deposition Number                        | 2224674                                                                          |

**Table S2.** Selected structural parameters for **8**

| <b>Bond length, Å</b> |          |
|-----------------------|----------|
| Ir1–N44               | 2.058(3) |
| Ir1–C43               | 2.027(3) |
| Ir1–N3                | 2.134(2) |
| Ir1–N32               | 2.044(3) |
| Ir1–N2                | 2.136(2) |
| Ir1–C55               | 2.007(3) |
| <b>Angle, °</b>       |          |
| N2–Ir1–N44            | 91.5(1)  |
| C55–Ir1–N44           | 81.0(1)  |
| C43–Ir1–N44           | 95.0(1)  |
| N3–Ir1–N44            | 97.4(1)  |
| N2–Ir1–N32            | 93.2(1)  |
| C55–Ir1–N32           | 94.8(1)  |
| C43–Ir1–N32           | 80.4(1)  |
| N3–Ir1–N32            | 87.6(1)  |
| N44–Ir1–N32           | 173.8(1) |
| N2–Ir1–C43            | 173.3(1) |
| N3–Ir1–C55            | 169.4(1) |

---

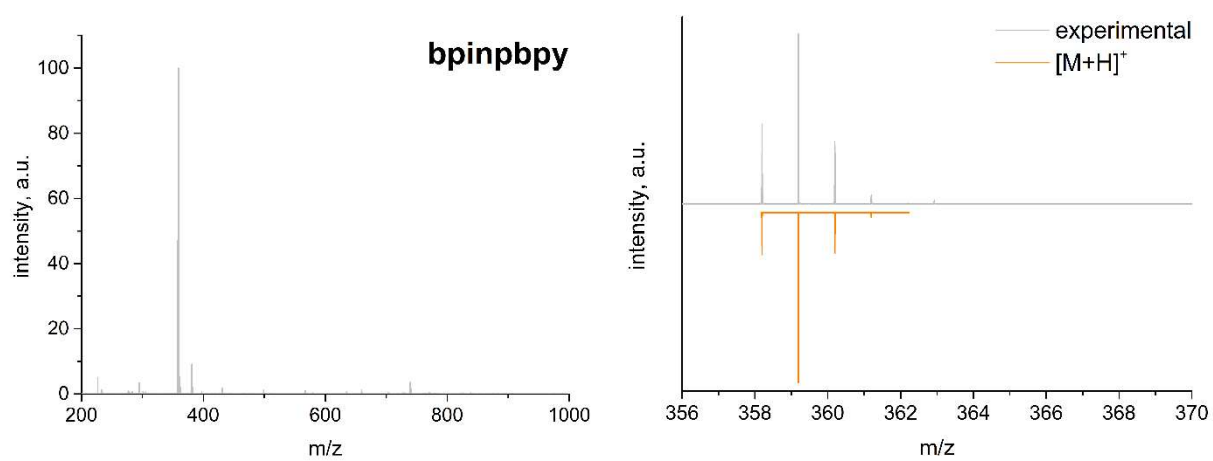

**Figure S1.** ESI<sup>+</sup> MS spectra of **Bpinbpy** with simulated isotope pattern of key signal.

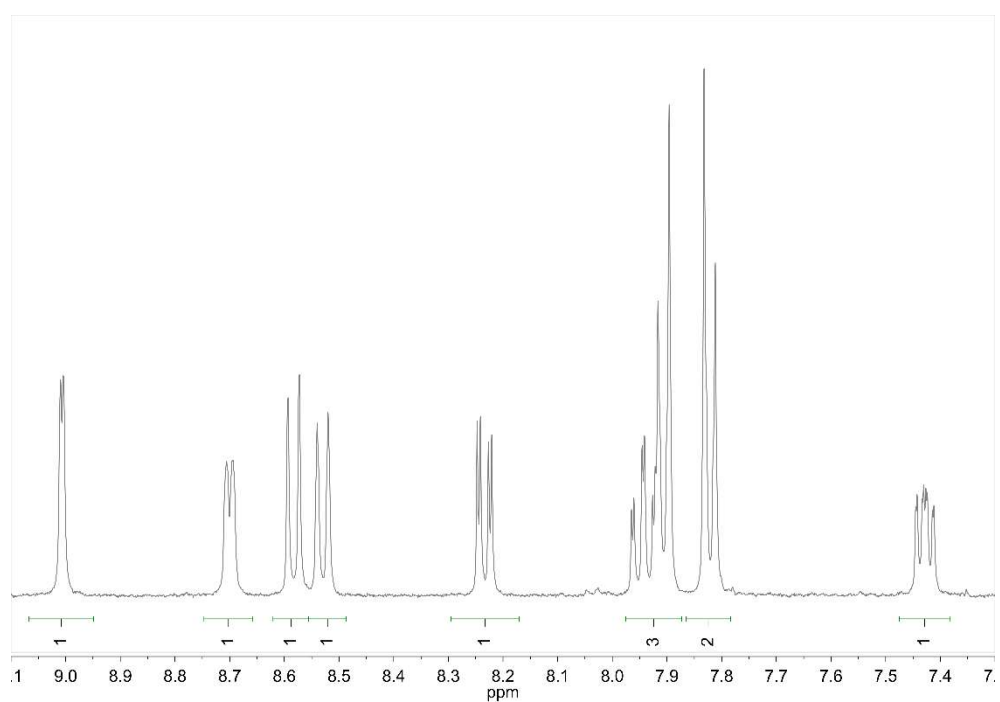

**Figure S2.** <sup>1</sup>H NMR spectra of **Bpinbpy**, aromatic range, acetone-d<sub>6</sub>, r.t.



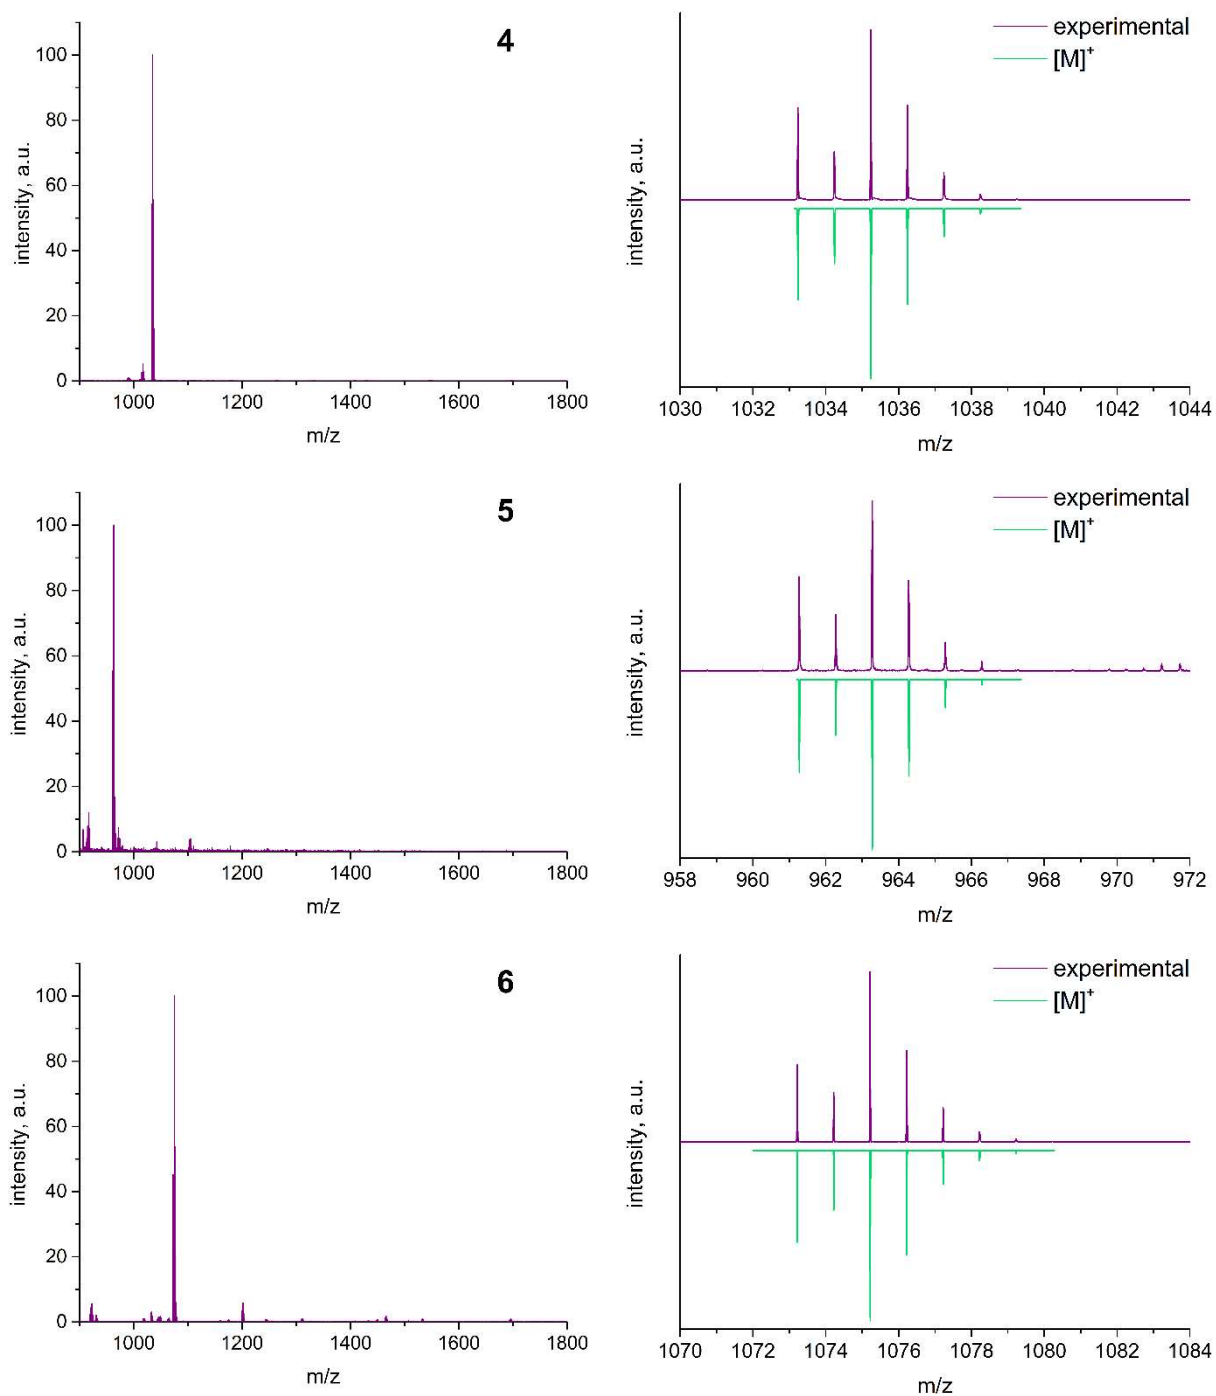

**Figure S3.** ESI<sup>+</sup> MS spectra of complexes 4–6 with simulated isotope pattern of key signal.

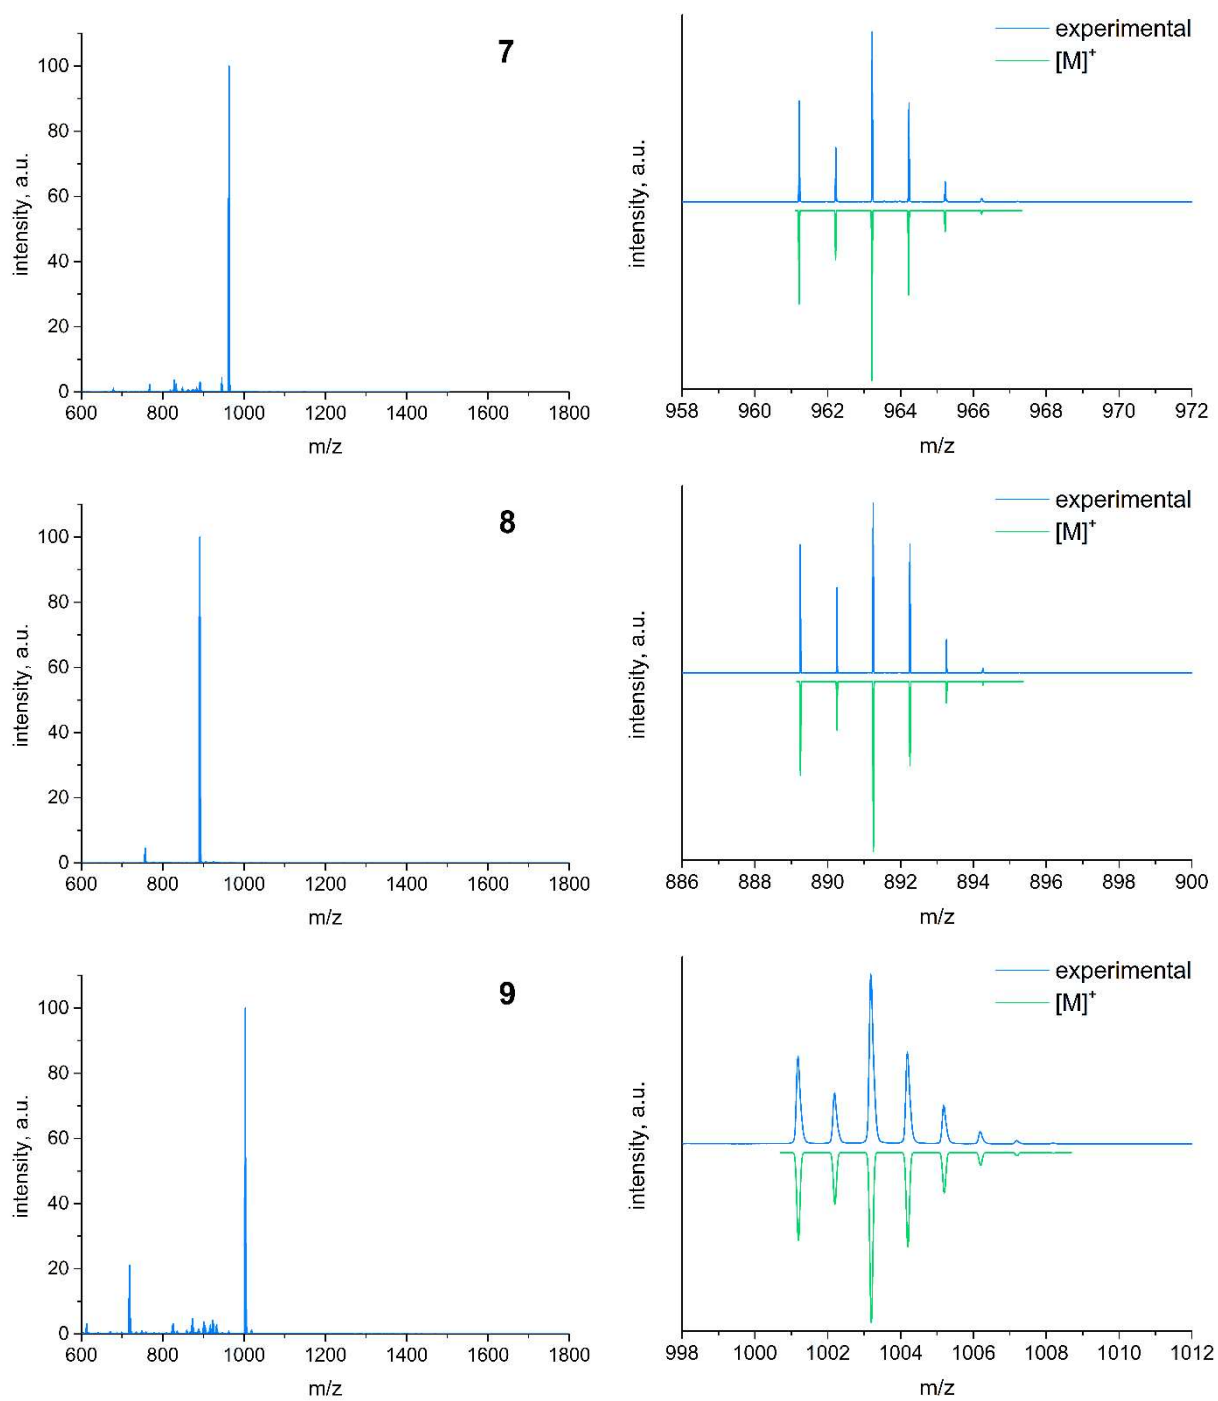

**Figure S4.** ESI<sup>+</sup> MS spectra of complexes 7–9 with simulated isotope pattern of key signal.

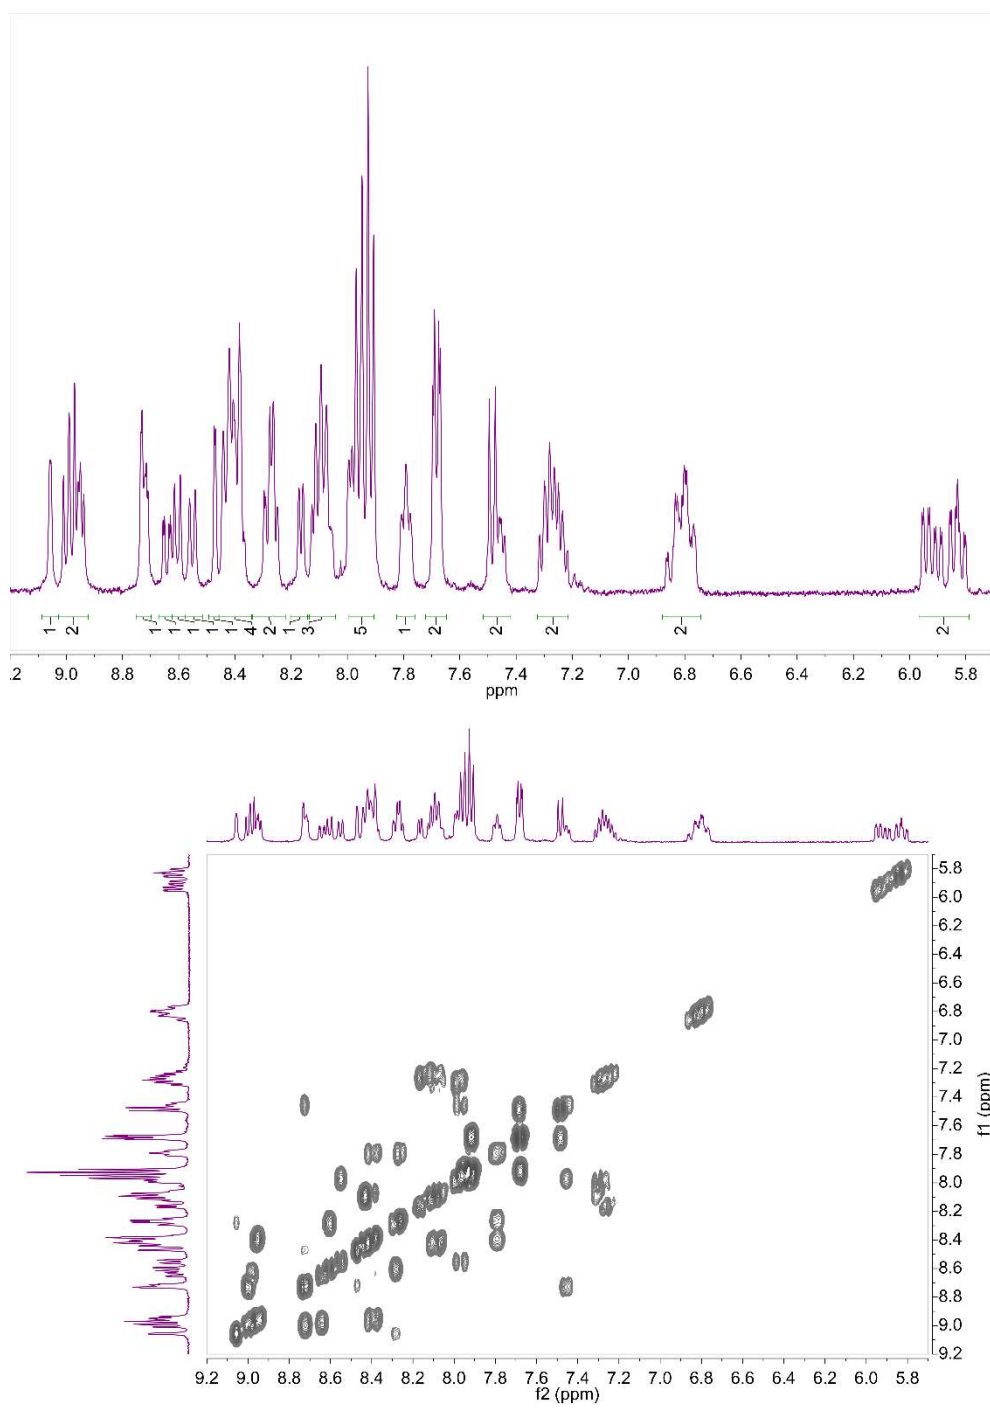

**Figure S5.** <sup>1</sup>H and <sup>1</sup>H<sup>1</sup>H COSY NMR spectra of **4**, aromatic range, acetone-d<sub>6</sub>, r.t.

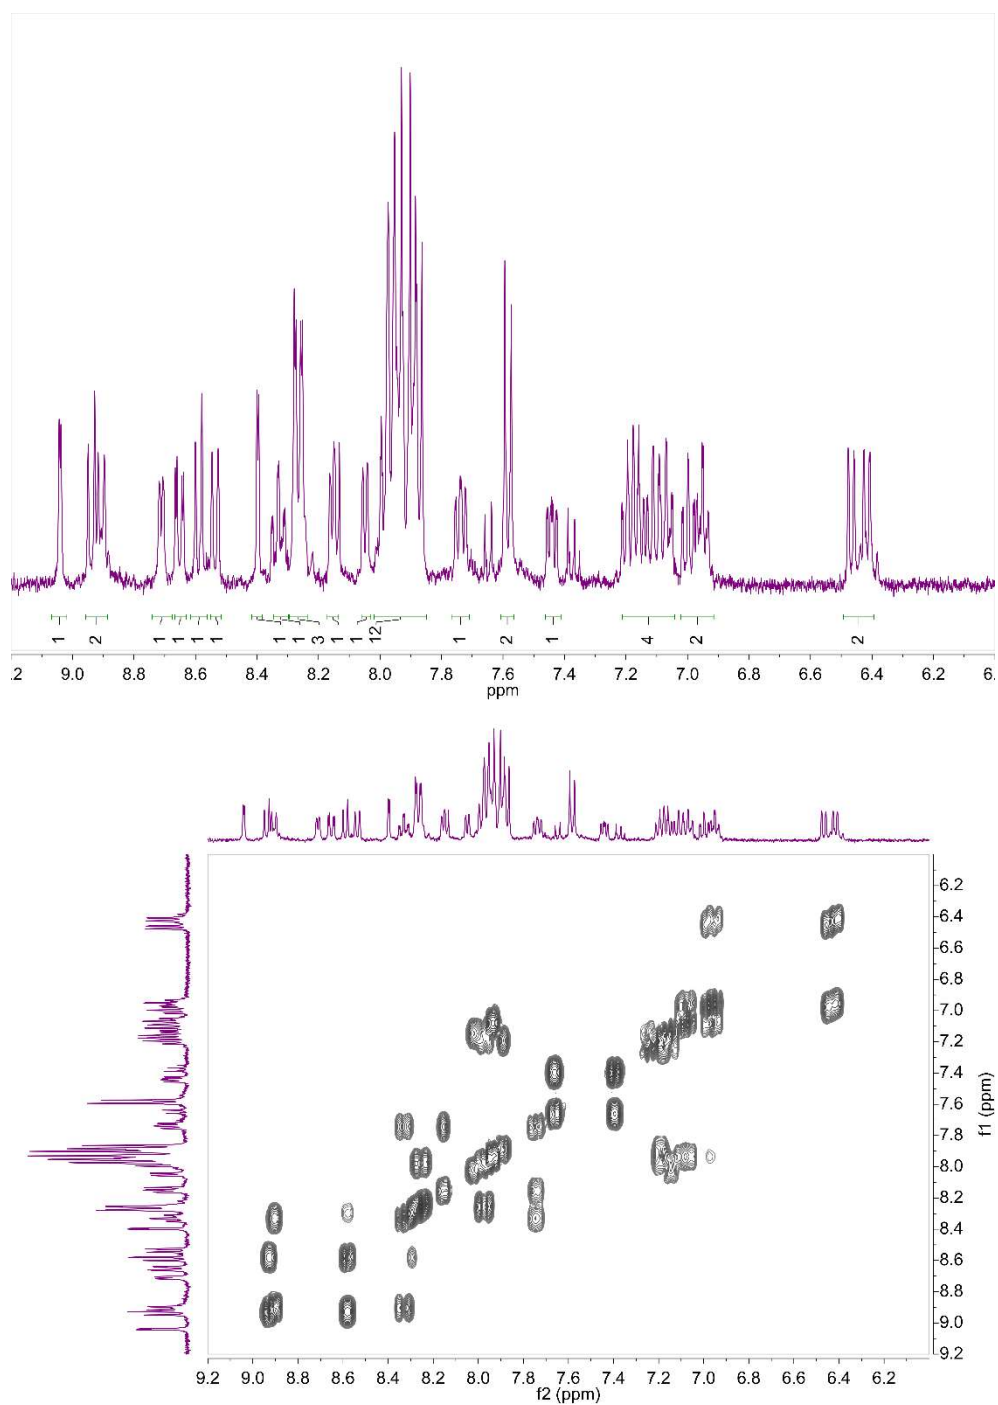

**Figure S6.**  $^1\text{H}$  and  $^1\text{H}^1\text{H}$  COSY NMR spectra of **5**, aromatic range, acetone- $d_6$ , r.t.

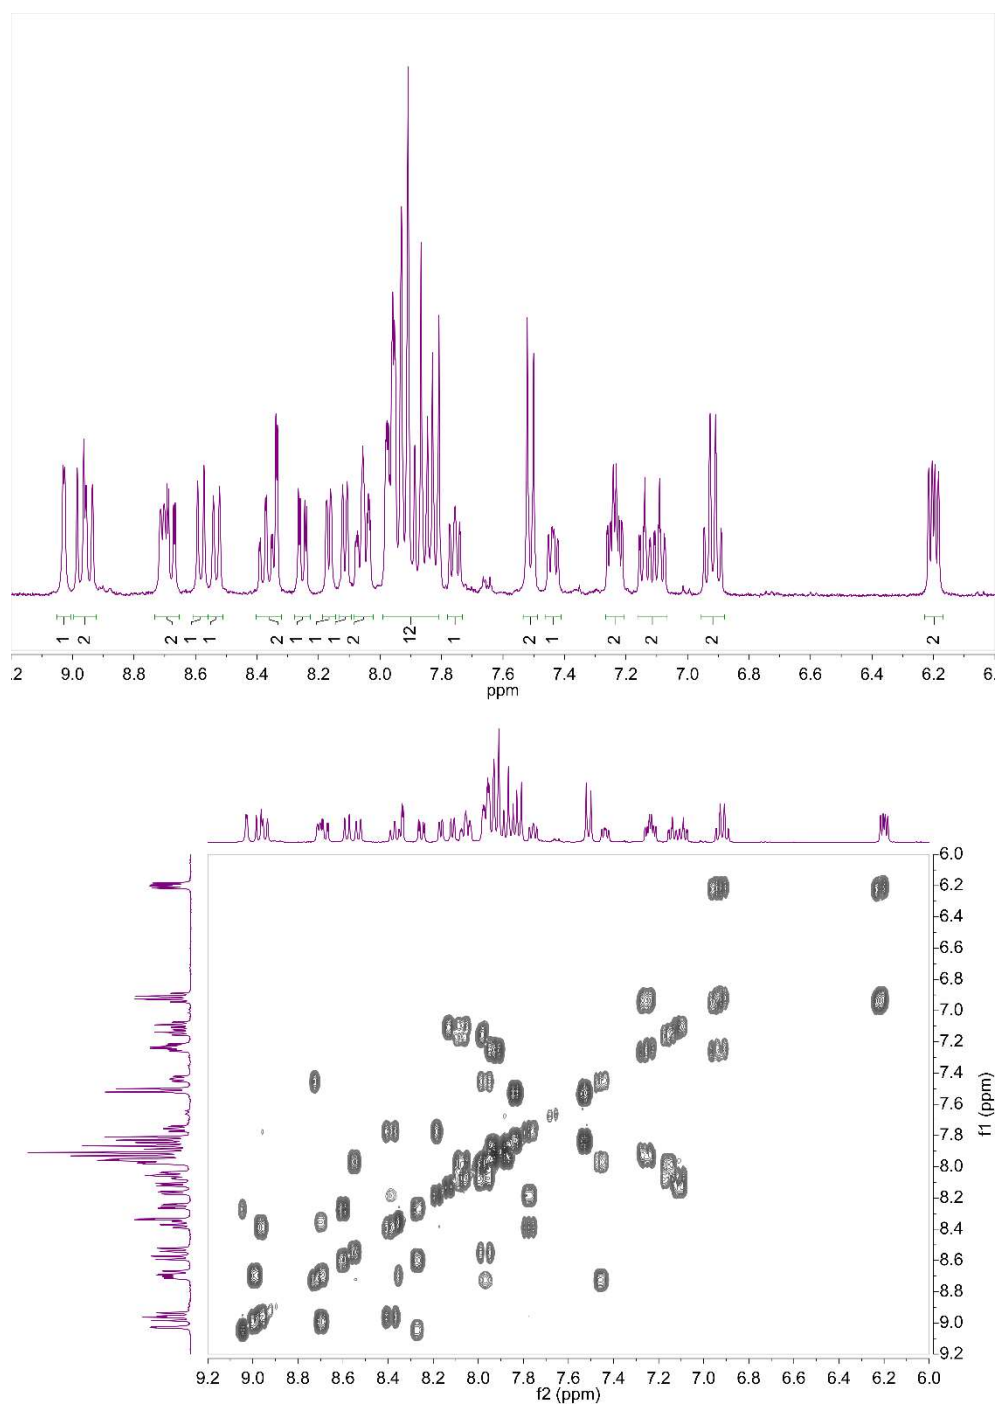

**Figure S7.**  $^1\text{H}$  and  $^1\text{H}$  $^1\text{H}$  COSY NMR spectra of **6**, aromatic range, acetone- $d_6$ , r.t.

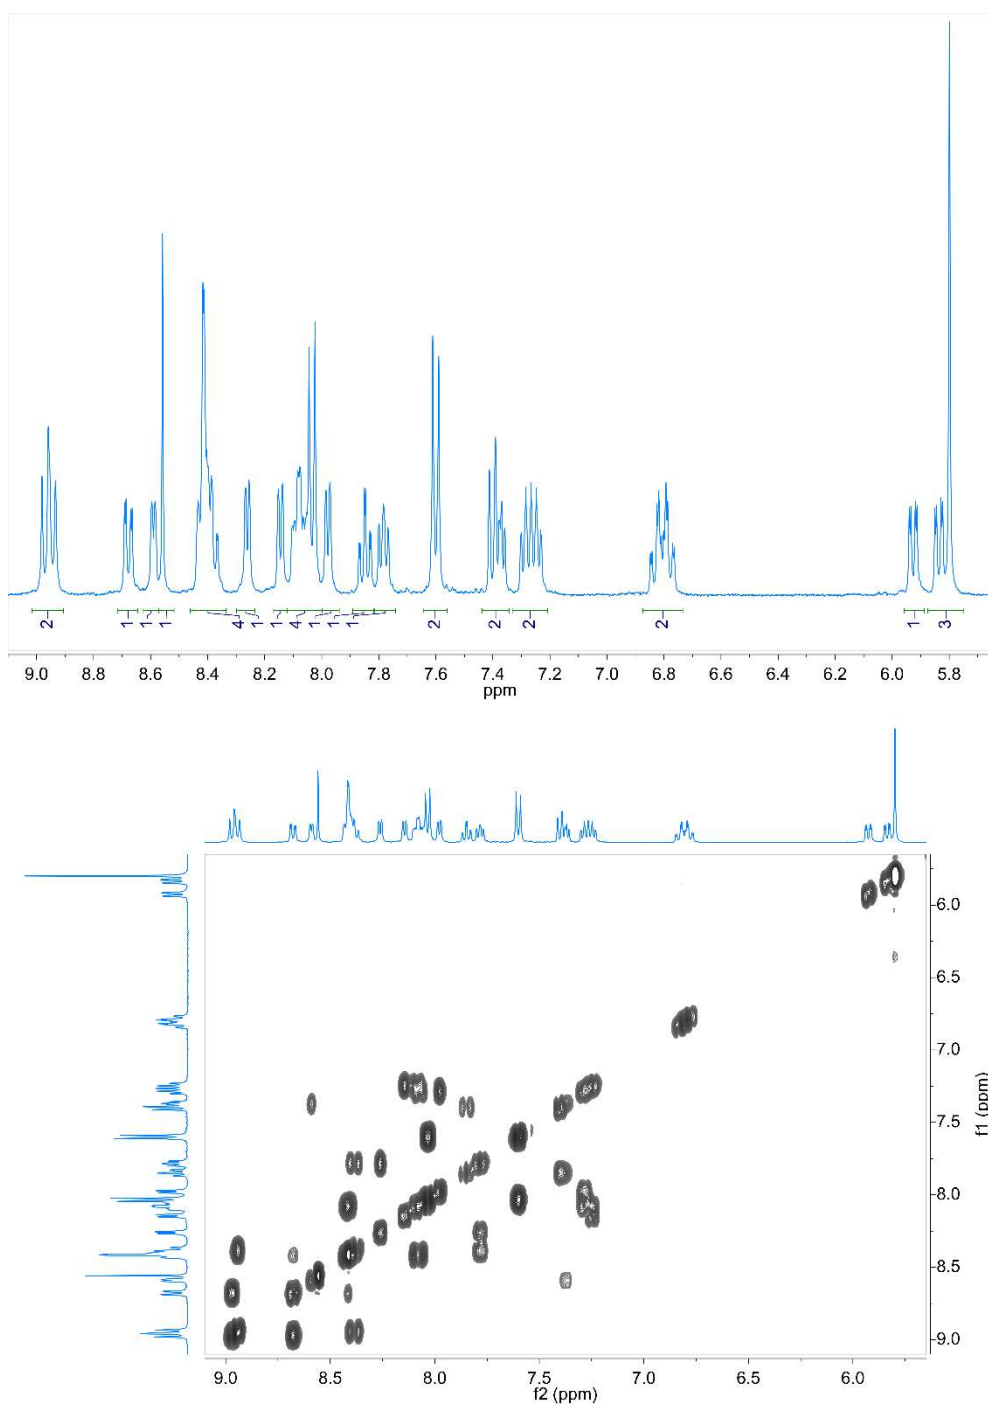

**Figure S8.**  $^1\text{H}$  and  $^1\text{H}$ - $^1\text{H}$  COSY NMR spectra of **7**, aromatic range, acetone- $\text{d}_6$ , r.t.

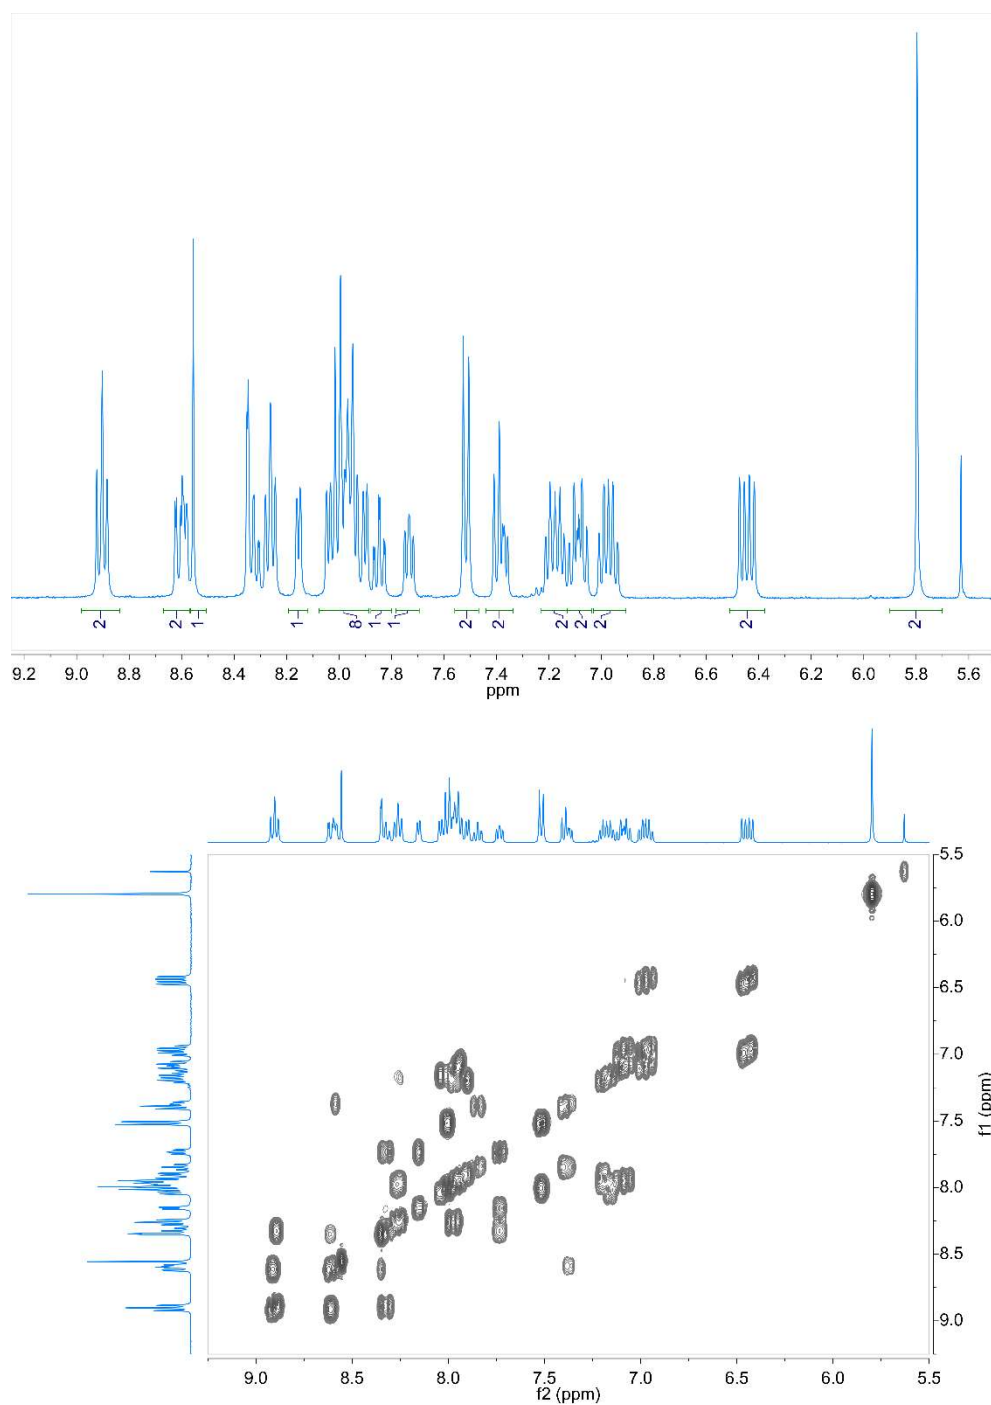

**Figure S9.**  $^1\text{H}$  and  $^1\text{H}^1\text{H}$  COSY NMR spectra of **8**, aromatic range, acetone- $\text{d}_6$ , r.t.

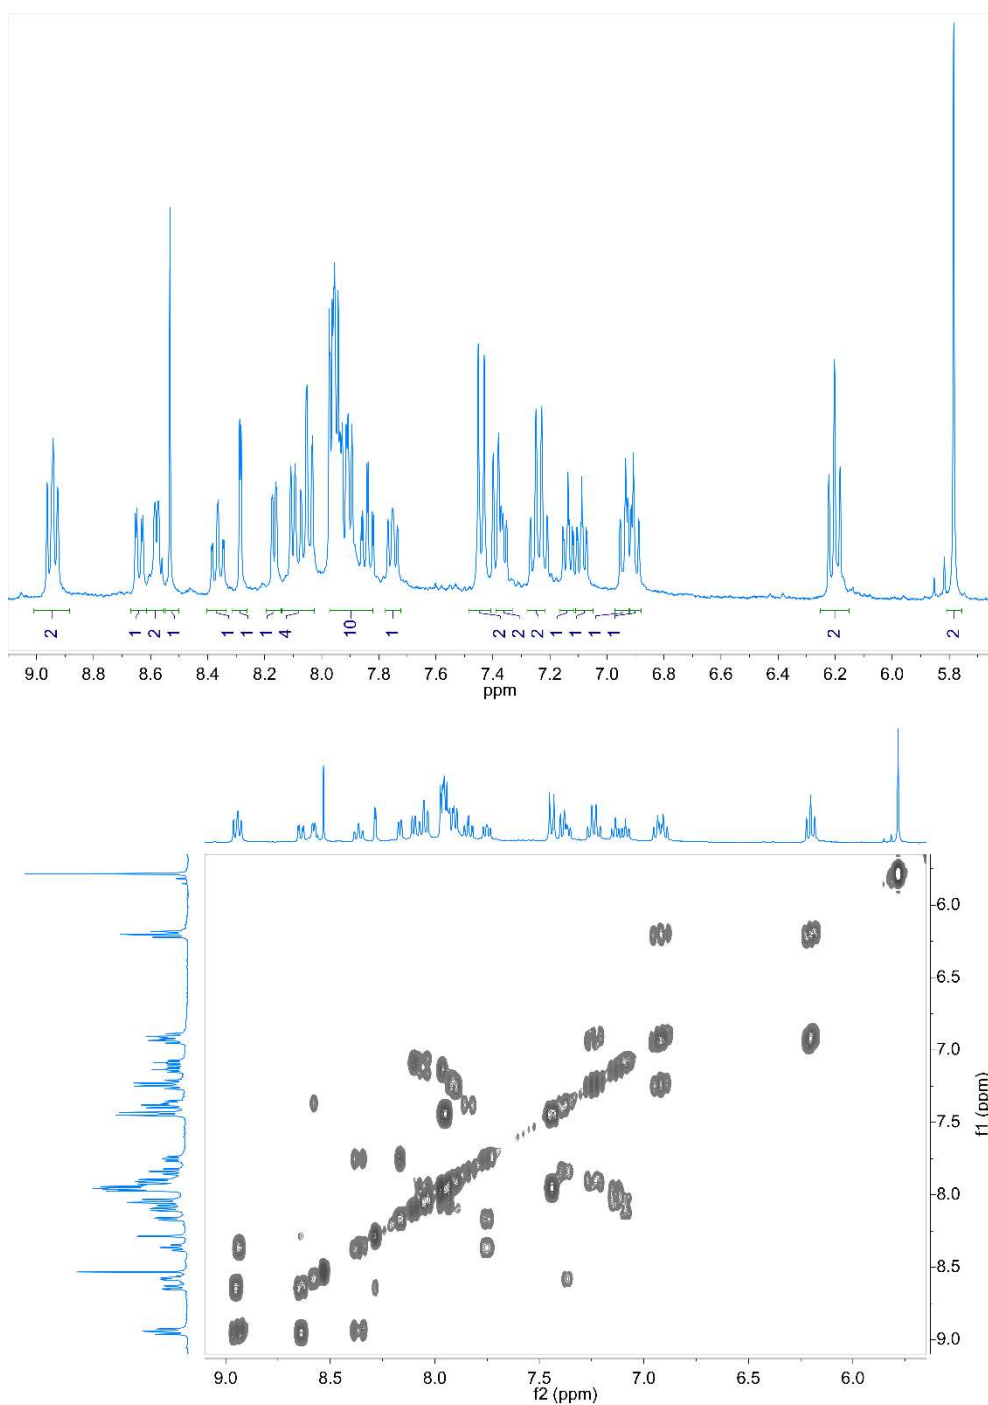

**Figure S10.**  $^1\text{H}$  and  $^1\text{H}$ - $^1\text{H}$  COSY NMR spectra of **9**, aromatic range, acetone- $d_6$ , r.t.



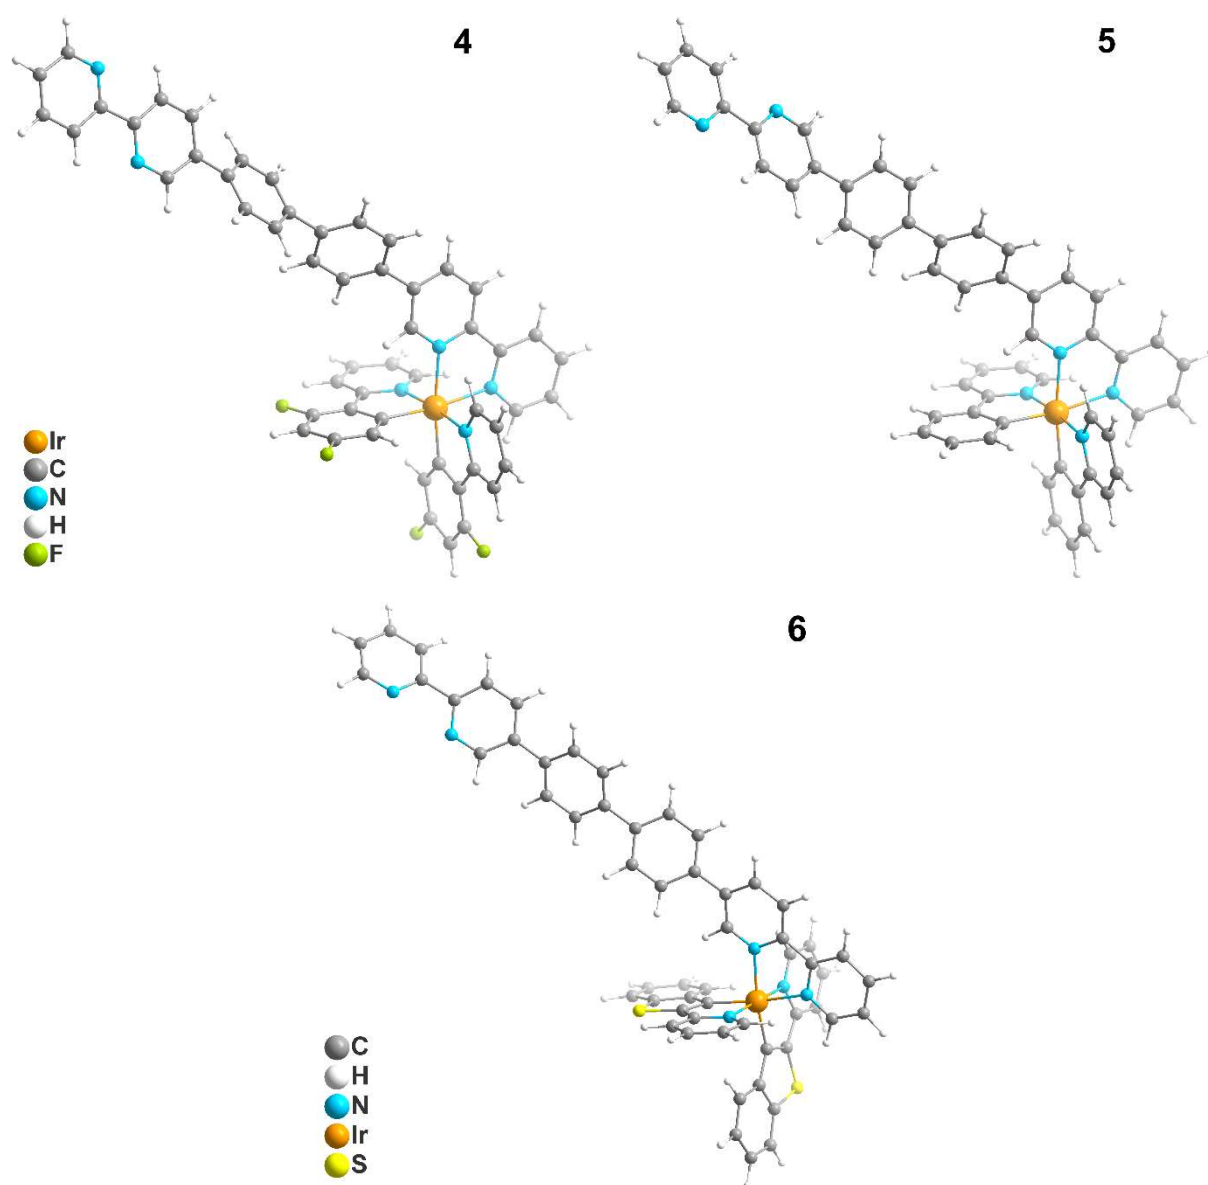

**Figure S11.** DFT-optimized structures of the complexes 4–6.

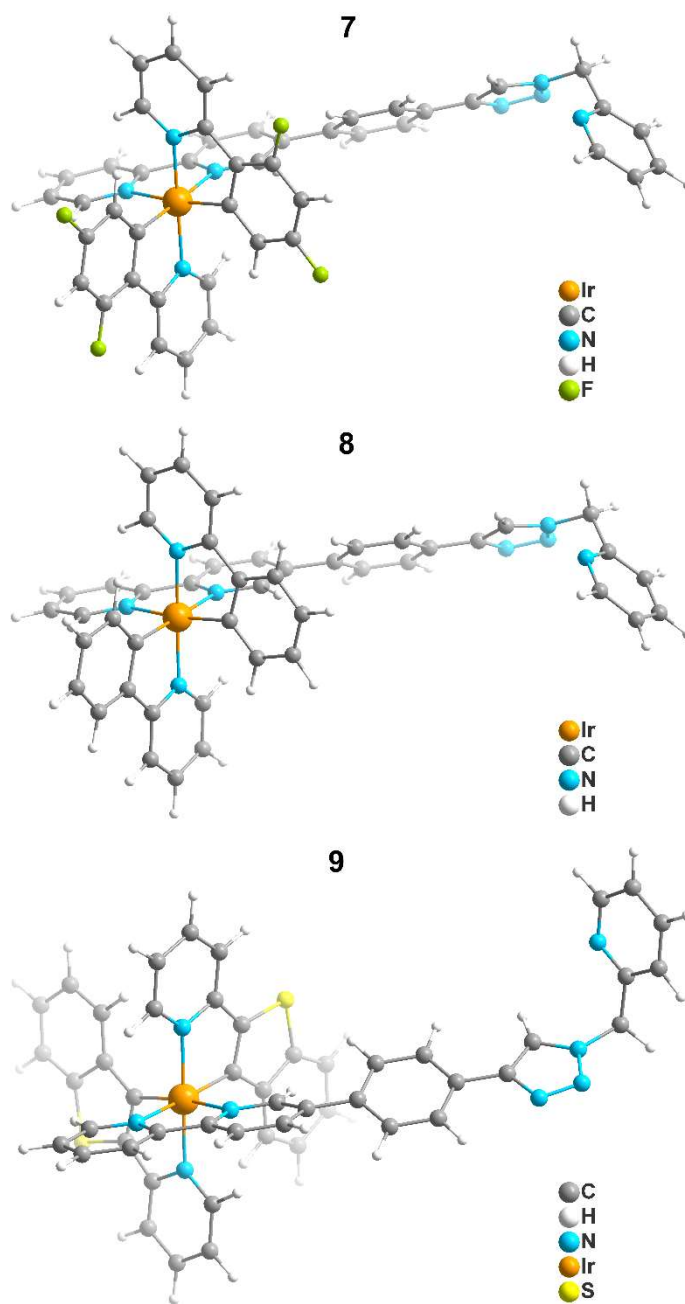

**Figure S12.** DFT-optimized structures of the complexes 7–9.

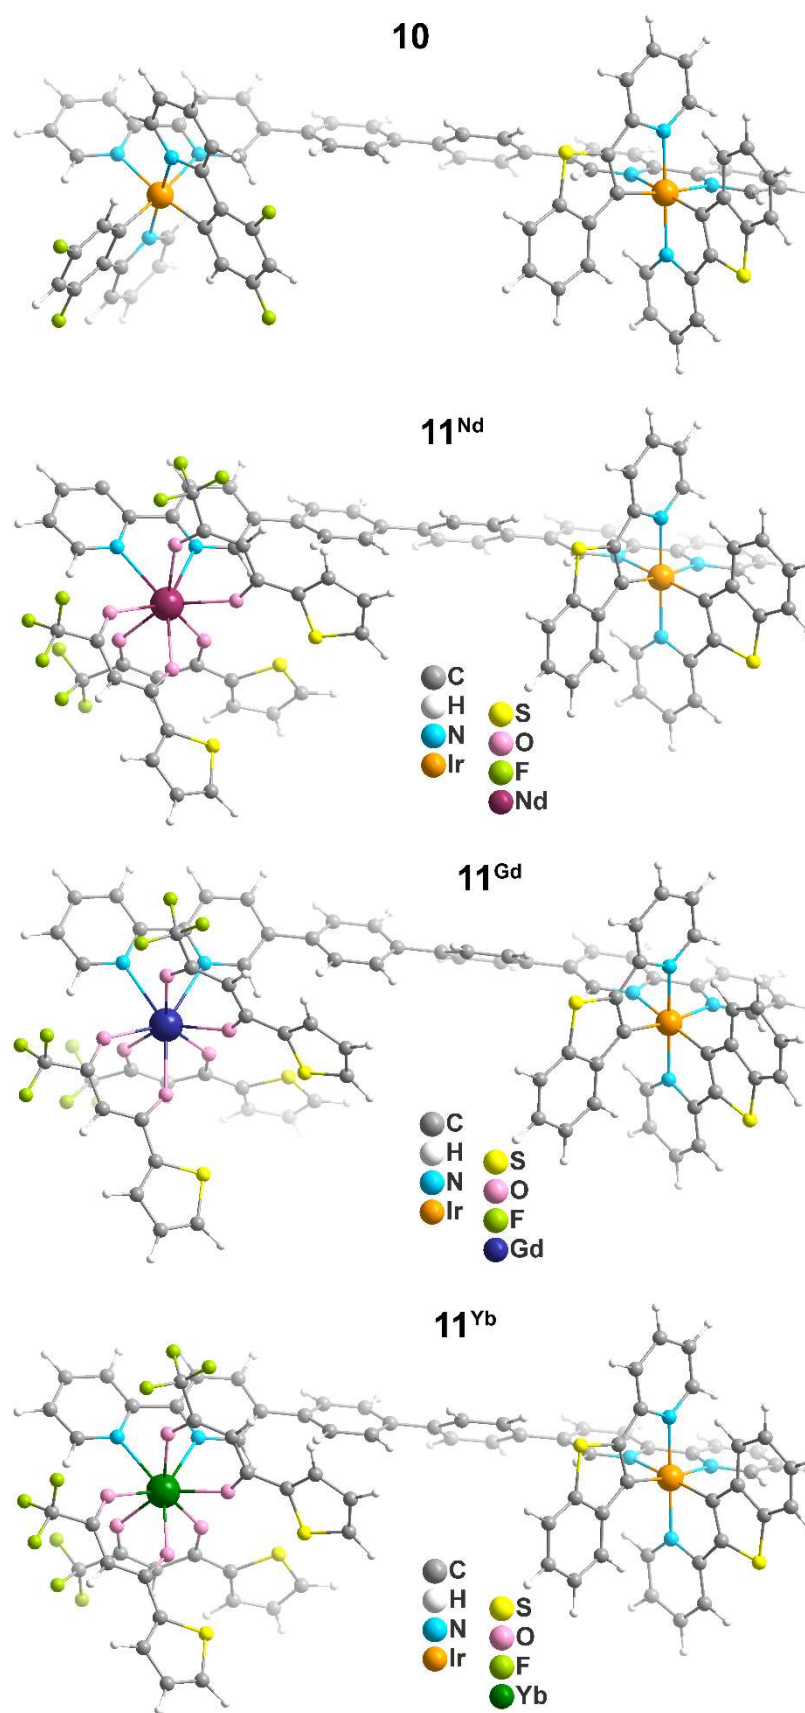

**Figure S13.** DFT-optimized structures of binuclear complexes **10** and **11<sup>Ln</sup>** (Ln = Nd, Gd, Yb).

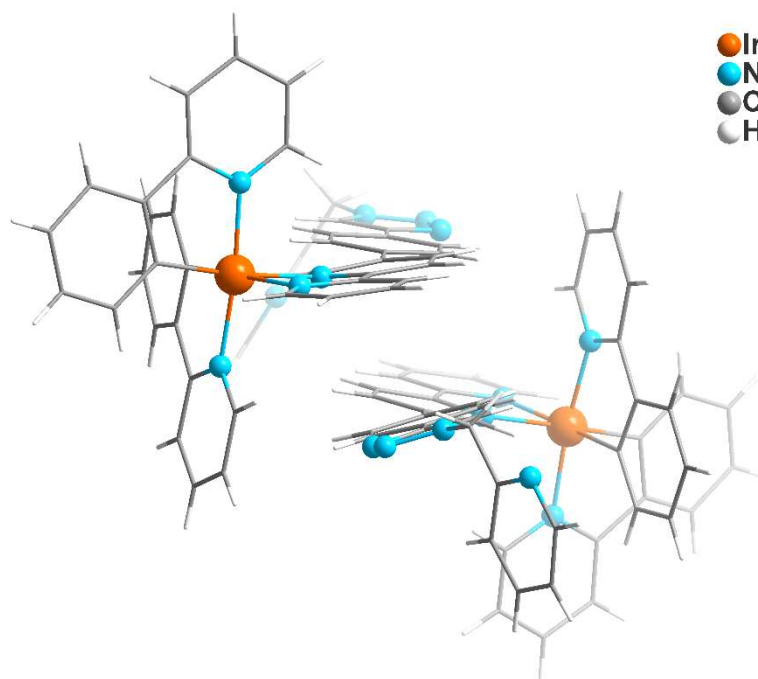

**Figure S14.** Visualization of molecular arrangement in **8** crystal. Anions  $[\text{PF}_6]^-$  are not shown. Colour legend: carbon – grey, nitrogen – sky blue, iridium – orange, hydrogen – white.

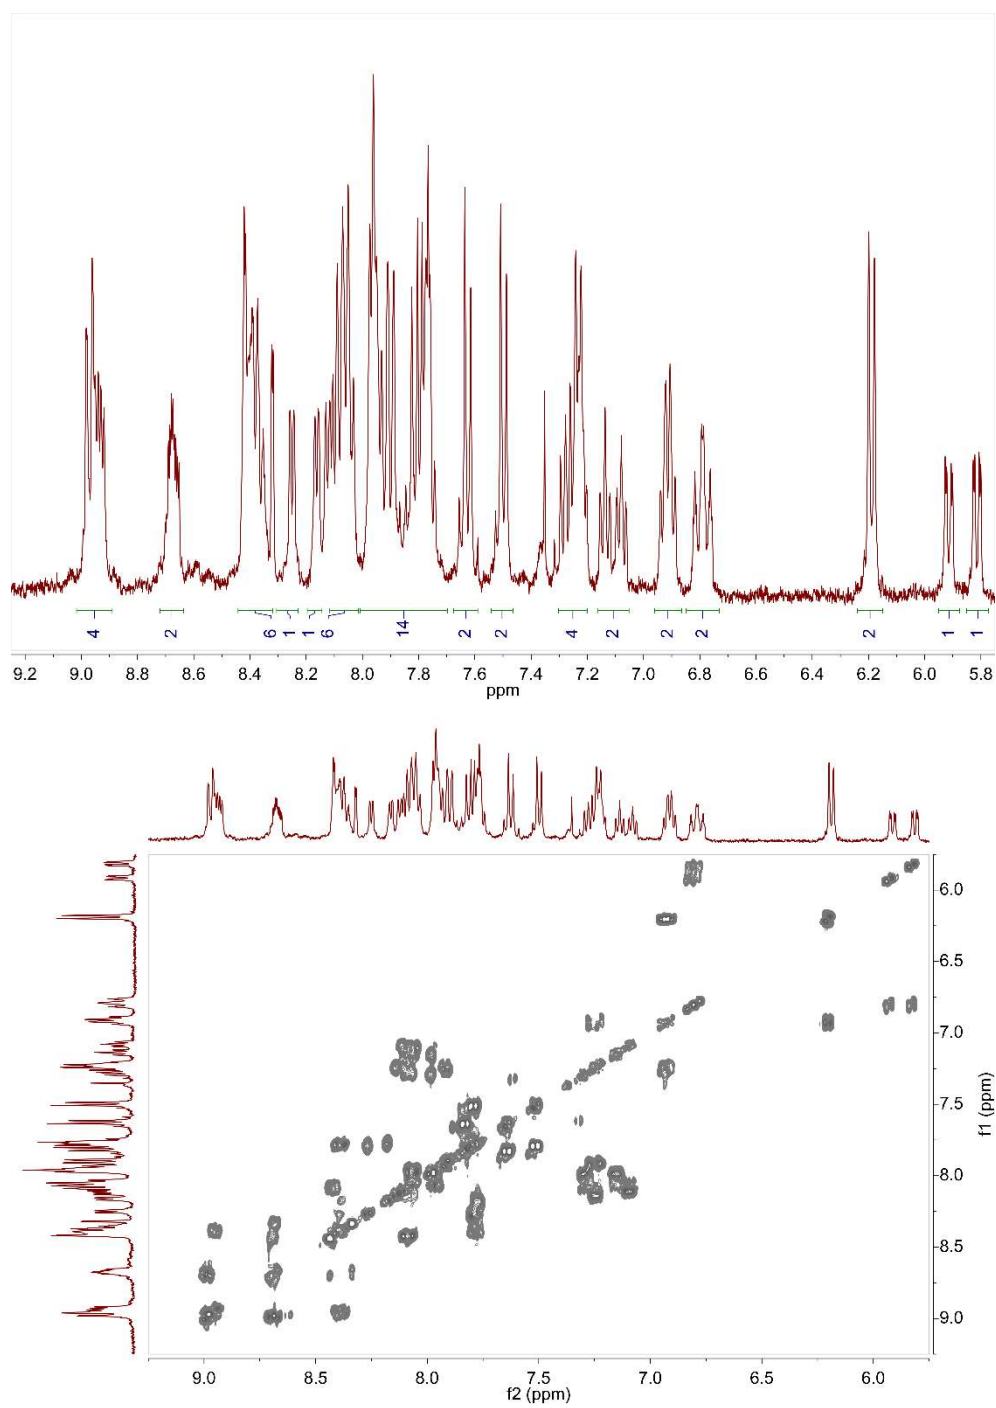

**Figure S15.**  $^1\text{H}$  and  $^1\text{H}$  $^1\text{H}$  COSY NMR spectra of **10**, aromatic range, acetone- $d_6$ , r.t.

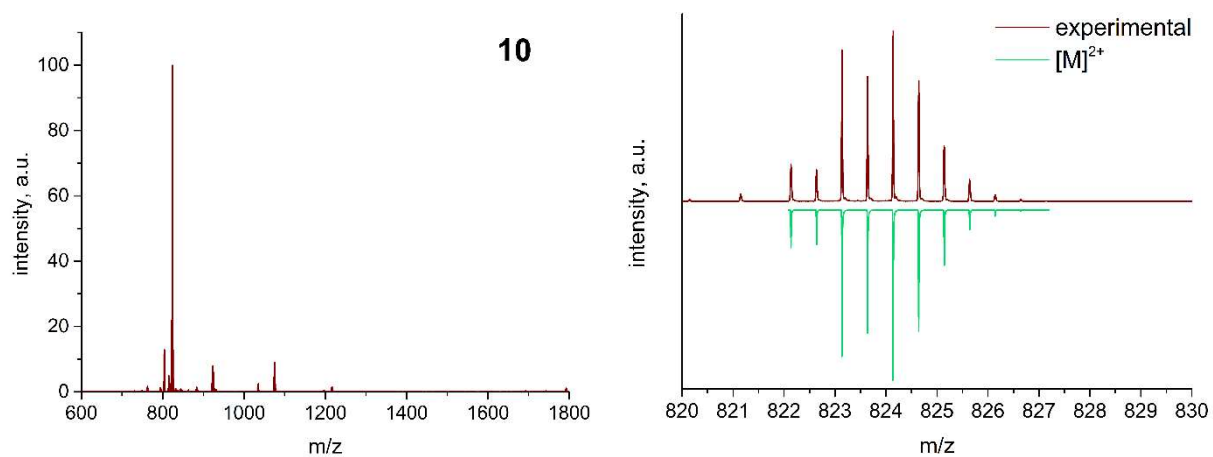

**Figure S16.** ESI<sup>+</sup> MS spectra of **10** with simulated isotope pattern of key signal corresponding to binuclear composition.

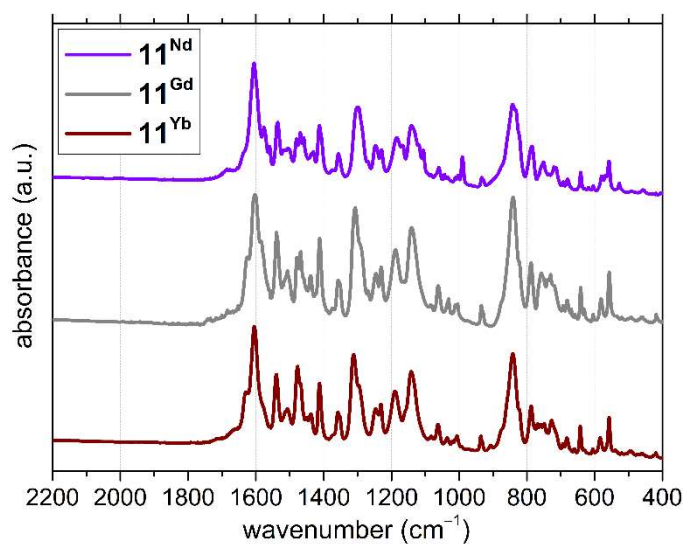

**Figure S17.** FTIR spectra of **11**<sup>Ln</sup>, KBr pellet, r.t.

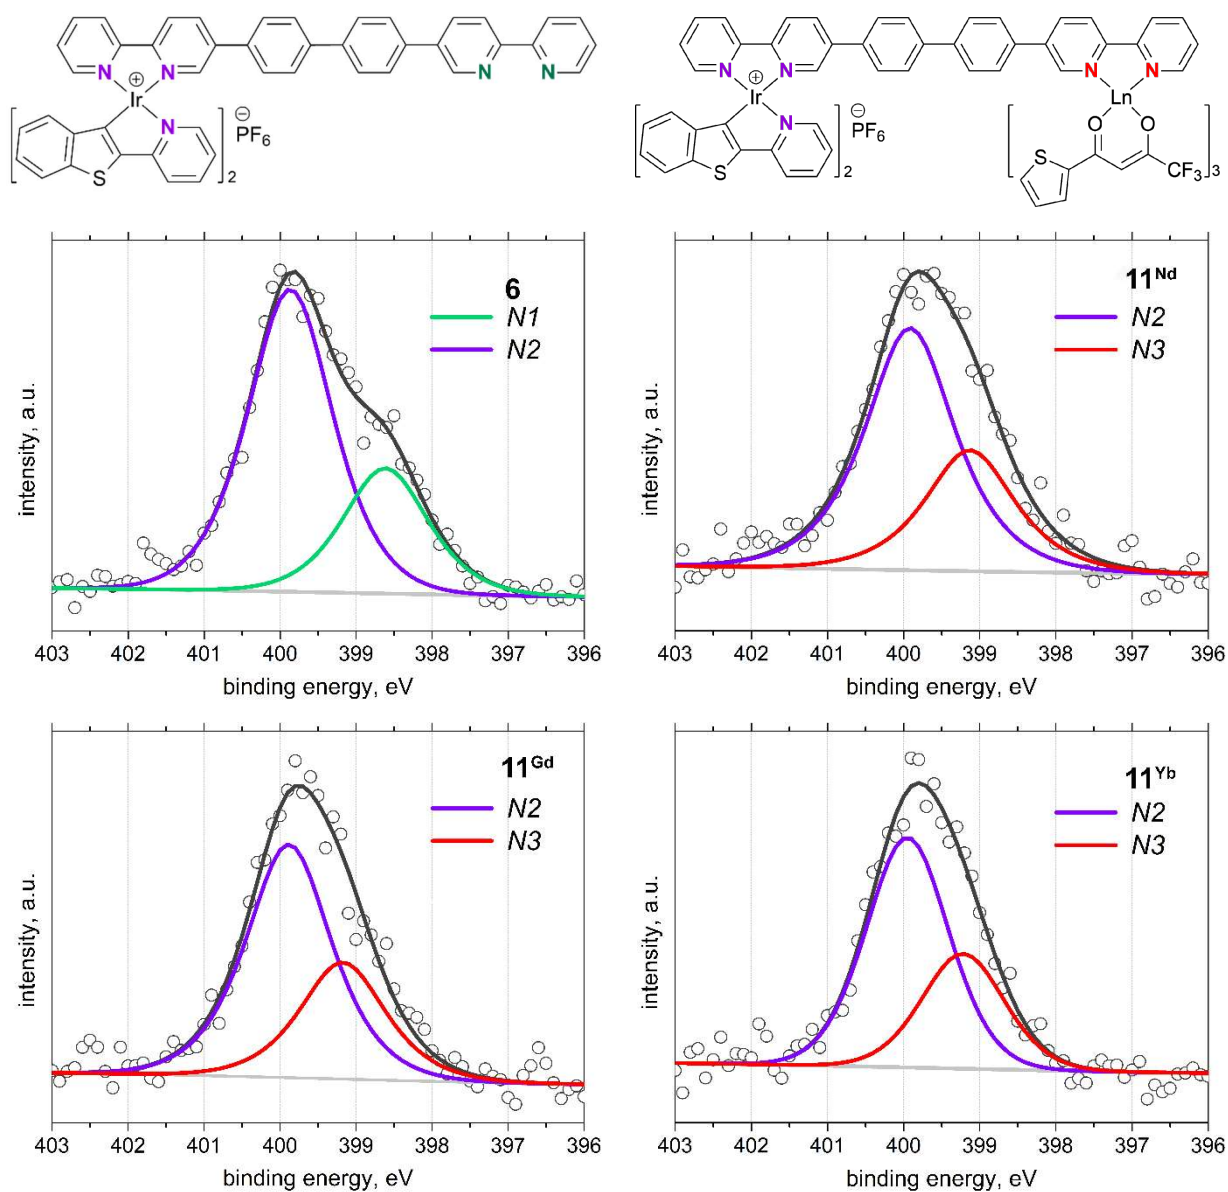

**Figure S18.** High-resolution N 1s XPS spectra of **6** and **11<sup>Ln</sup>**.

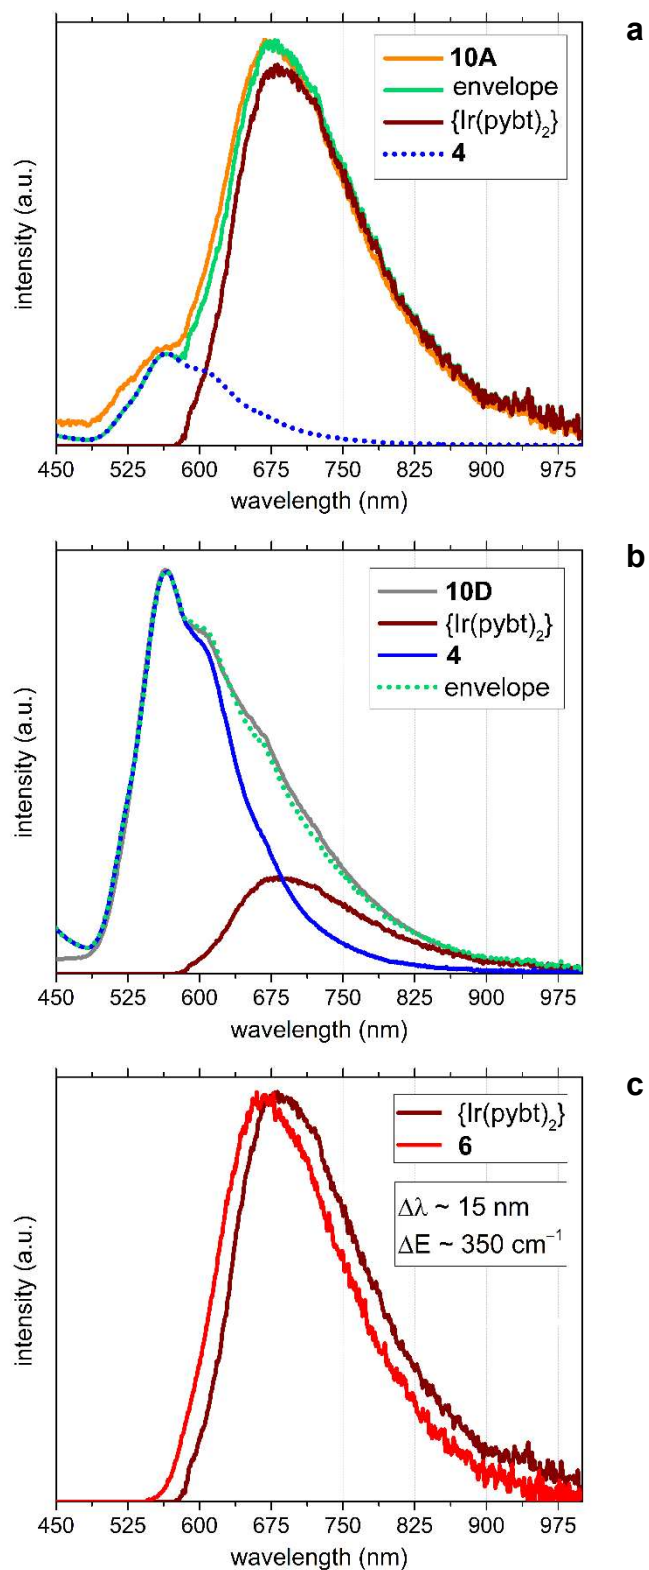

**Figure S19.** Deconvolution of the emission spectrum of **10** into two independent bands; (a) aerated DCE solution, (b) deaerated DCE solution, (c) difference between native emission band of **6** and emission band used for deconvolution {Ir(pybt)<sub>2</sub>}.



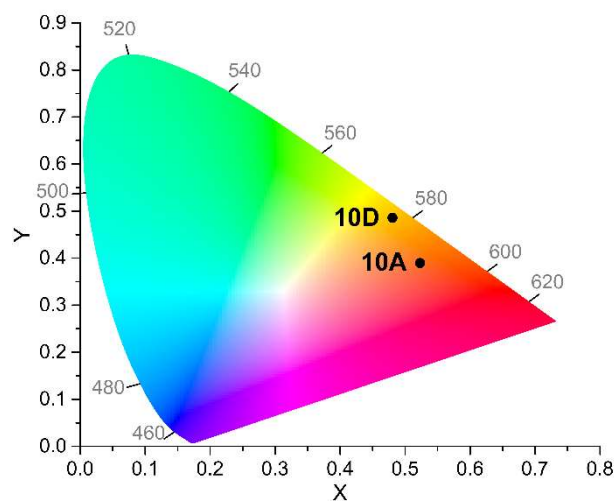

|            | x    | y    |
|------------|------|------|
| <b>10D</b> | 0.48 | 0.49 |
| <b>10A</b> | 0.52 | 0.39 |

**Figure S20.** CIE 1931 coordinates for **10** (A = aerated, D = de-aerated) in solution, DCE, r.t.

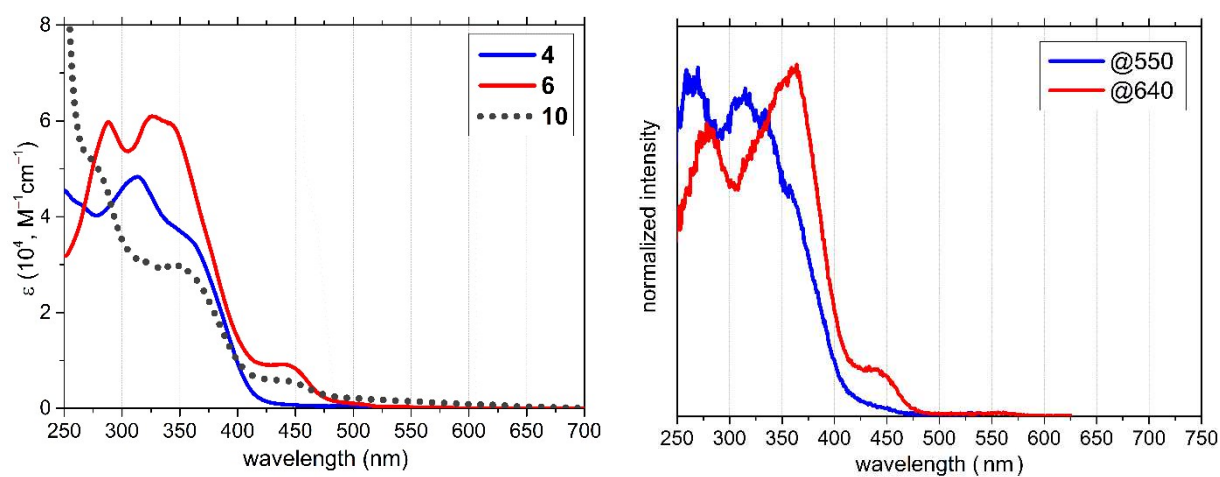

**Figure S21.** UV-vis spectra of **4**, **6** and **10** (left) and normalized excitation spectra of **10** (right), DCE solution, r.t.

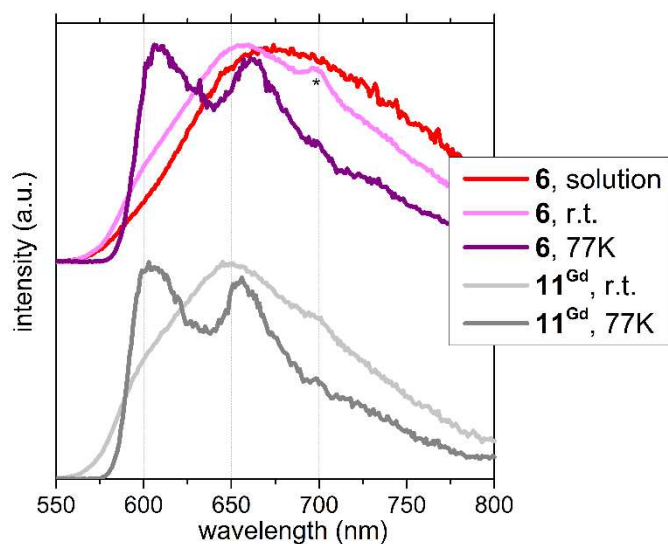

**Figure S22.** Comparison of solid-state emission of **6** and **11<sup>Gd</sup>** at variable temperature with emission of **6** in DCE solution.

**Table S3.** Optical and photophysical properties of **11<sup>Ln</sup>** (Ln = Nd, Gd, Yb) complexes

|                        | $\lambda_{abs}$ , nm ( $\epsilon$ , $10^3 \text{ M}^{-1} \text{ cm}^{-1}$ )                                  | $\lambda_{em}$ ,* nm [media]          | $\tau_{obs}$ , $\mu\text{s}$ [ $\lambda_{em}$ , nm] <sup>#</sup> |
|------------------------|--------------------------------------------------------------------------------------------------------------|---------------------------------------|------------------------------------------------------------------|
| <b>11<sup>Nd</sup></b> | 289(81), 305(76) <sup>sh</sup> , 325(85), 337(83) <sup>sh</sup> ,<br>345(84), 422(10) <sup>sh</sup> , 440(9) | 689 [DCE]                             | –                                                                |
| <b>11<sup>Gd</sup></b> | 289(77), 305(71) <sup>sh</sup> , 325(81), 337(78) <sup>sh</sup> ,<br>345(79), 422(10) <sup>sh</sup> , 440(9) | r.t. 645 [solid]<br>77K 603** [solid] | –                                                                |
| <b>11<sup>Yb</sup></b> | 289(71), 305(66) <sup>sh</sup> , 325(74), 337(72) <sup>sh</sup> ,<br>345(73), 422(10) <sup>sh</sup> , 440(9) | 689; 975 [DCE]                        | 0.3 [689];<br>9.8 [975]                                          |

\*  $\lambda_{excit}$  351 nm

\*\* vibronic spacing is *ca.* 1250  $\text{cm}^{-1}$

# deaerated DCE solution

**Table S4.** The energy of f→f transitions of Nd(III) from the  $^4\text{I}_{9/2}$  ground state between  $^4\text{F}_{3/2}$ .(emissive level) and  $^2\text{G}_{7/2}$  level.<sup>2</sup>

| Level                                   | E, $\text{cm}^{-1}$ |
|-----------------------------------------|---------------------|
| <b><math>^2\text{G}_{7/2}</math></b>    | <b>17460</b>        |
| $^4\text{G}_{5/2}$                      | 17300               |
| $^2\text{H}_{11/2}$                     | 15870               |
| $^4\text{F}_{9/2}$                      | 14700               |
| $^4\text{F}_{7/2}$ , $^4\text{S}_{3/2}$ | 13500               |
| $^2\text{H}_{9/2}$                      | 12590               |
| $^4\text{F}_{5/2}$                      | 12480               |
| <b><math>^4\text{F}_{3/2}</math></b>    | <b>11460</b>        |

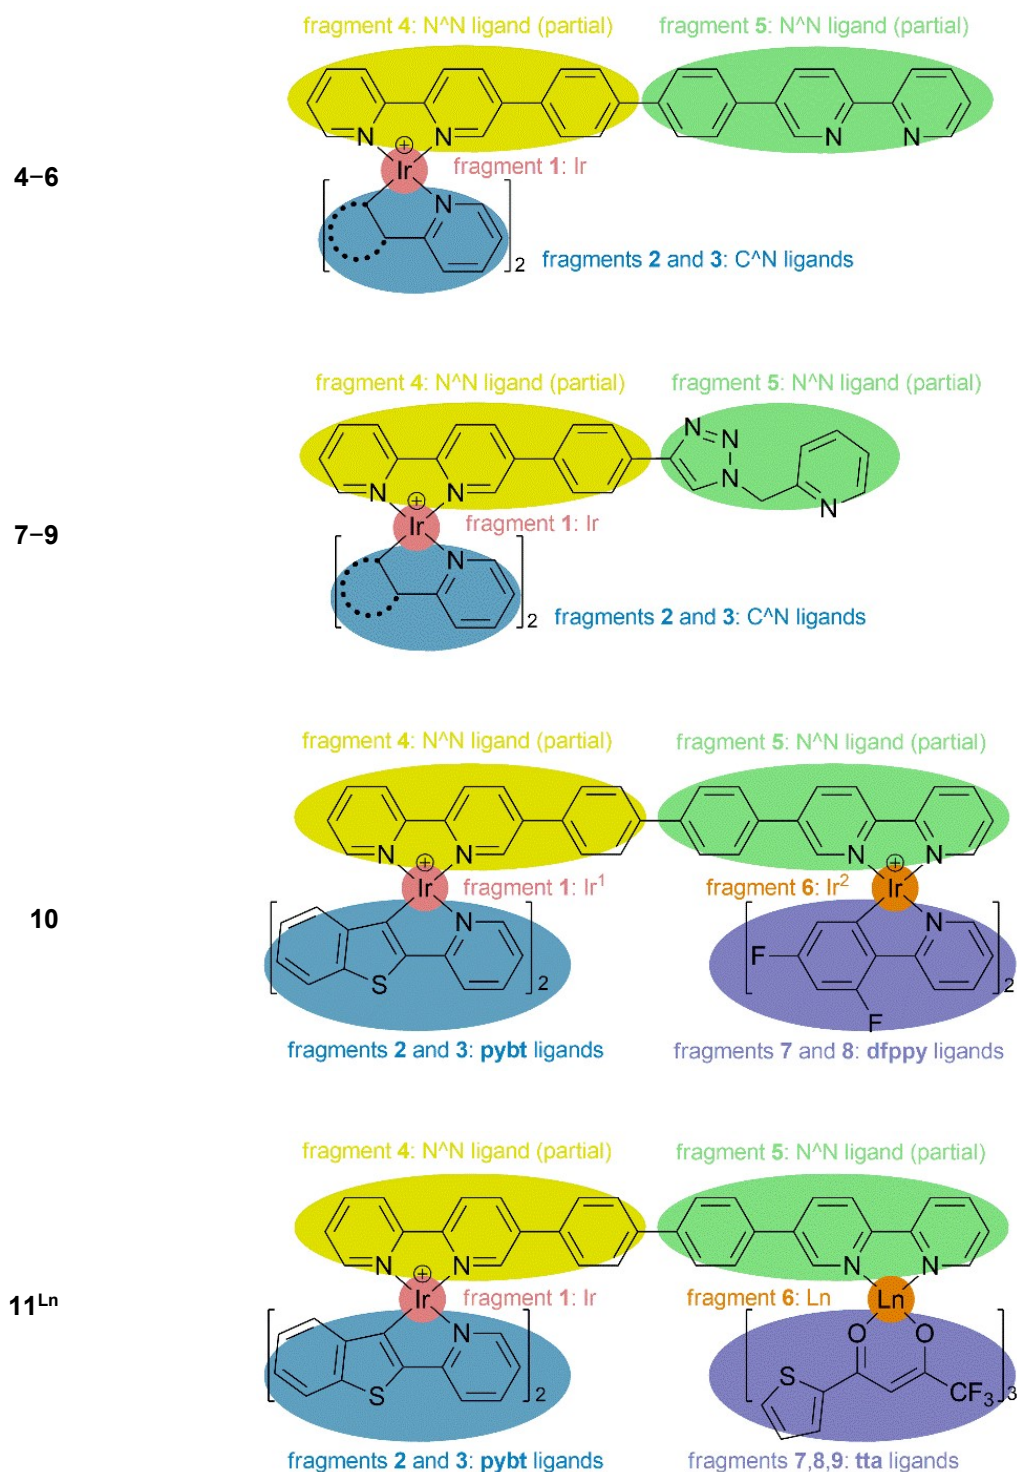

**Figure S23.** Fragment decomposition of complexes used for excited state population analysis.

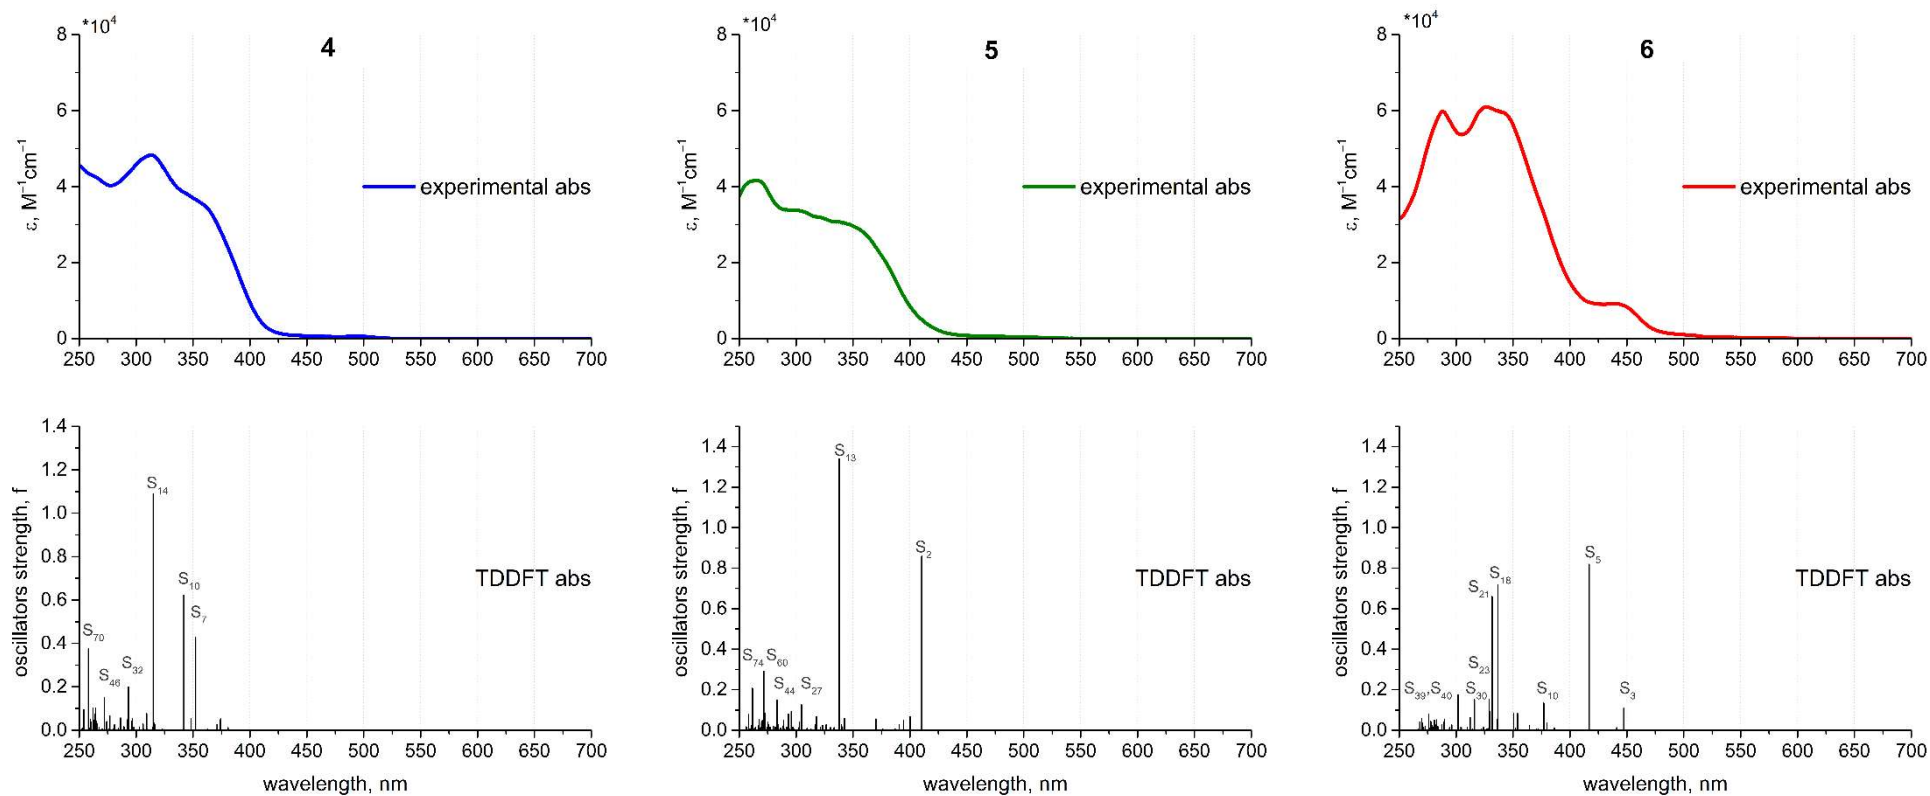

**Figure S24.** TDDFT spectra of 4–6. Singlets with  $f > 0.1$  are indicated. Experimental spectra are given for comparison.

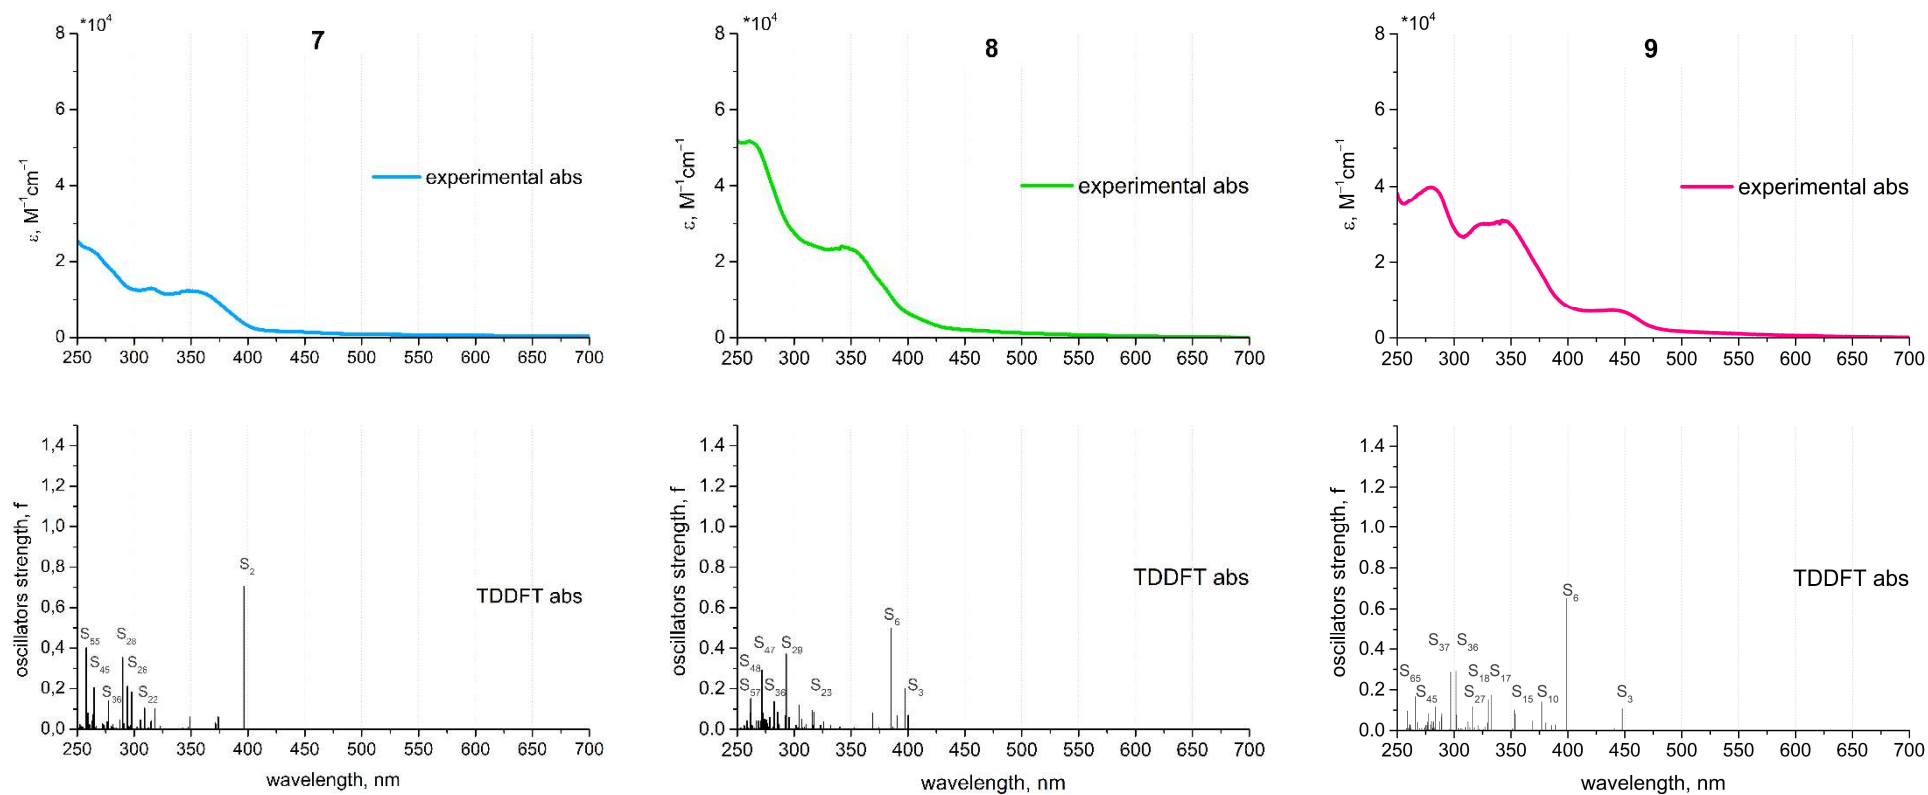

**Figure S25.** TDDFT spectra of 7–9. Singlets with  $f > 0.1$  are indicated. Experimental spectra are given for comparison.

**Table S5.** Natural Transition Orbital analysis of **singlets** with oscillator strength  $f > 0.1$  in 4–9.

| Excited state   | $\lambda$ , nm | $f$    | NTO and its population over fragments <sup>#</sup>                                                                                              | NTO* and its population over fragments <sup>#</sup>                                                                                    | Transition character |
|-----------------|----------------|--------|-------------------------------------------------------------------------------------------------------------------------------------------------|----------------------------------------------------------------------------------------------------------------------------------------|----------------------|
| <b>4</b>        |                |        |                                                                                                                                                 |                                                                                                                                        |                      |
| S <sub>7</sub>  | 352            | 0.4268 | 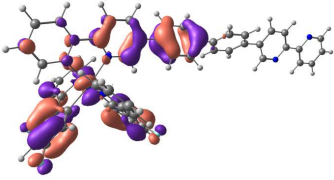<br>Fr4 = 0.41, Fr2 = 0.36, Fr3 = 0.14, Fr1 = 0.08, Fr5 = 0.01 | <br>Fr4 = 0.98, Fr1 = 0.01                           | LC, LLCT             |
| S <sub>10</sub> | 342            | 0.6221 | <br>Fr4 = 0.52, Fr2 = 0.22, Fr1 = 0.14, Fr3 = 0.10, Fr5 = 0.01 | <br>Fr4 = 0.98, Fr1 = 0.03                           | LC, LLCT, MLCT       |
| S <sub>14</sub> | 315            | 1.0882 | <br>Fr5 = 0.99, Fr4 = 0.01                                    | <br>Fr5 = 0.99                                      | LC                   |
| S <sub>32</sub> | 293            | 0.1980 | <br>Fr3 = 0.35, Fr1 = 0.33, Fr2 = 0.27, Fr4 = 0.05           | <br>Fr2 = 0.52, Fr3 = 0.43, Fr1 = 0.05             | LC, MLCT             |
| S <sub>46</sub> | 272            | 0.1494 | <br>Fr2 = 0.47, Fr3 = 0.41, Fr1 = 0.10, Fr4 = 0.02           | <br>Fr4 = 1.00, Fr1 = 0.02                         | LLCT, MLCT           |
| S <sub>70</sub> | 258            | 0.3741 | <br>Fr1 = 0.51, Fr2 = 0.24, Fr3 = 0.23, Fr4 = 0.02           | <br>Fr1 = 0.38, Fr3 = 0.32, Fr2 = 0.28, Fr4 = 0.02 | LC, MC               |

|                 |     |        |                                                                                     |                                                                                      |          |
|-----------------|-----|--------|-------------------------------------------------------------------------------------|--------------------------------------------------------------------------------------|----------|
| S <sub>2</sub>  | 397 | 0.7039 | 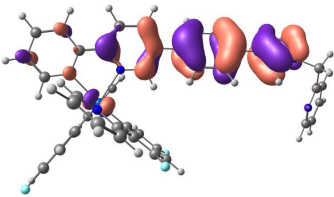   |    | LC       |
|                 |     |        | Fr4 = 0.65, Fr5 = 0.31, Fr1 = 0.04                                                  | Fr4 = 0.96, Fr1 = 0.03, Fr5 = 0.02                                                   |          |
| S <sub>22</sub> | 298 | 0.1820 |    |    | LC       |
|                 |     |        | Fr4 = 0.74, Fr5 = 0.23, Fr1 = 0.02                                                  | Fr4 = 0.98, Fr1 = 0.03                                                               |          |
| S <sub>26</sub> | 294 | 0.2114 |    |    | MLCT, LC |
|                 |     |        | Fr1 = 0.42, Fr2 = 0.31, Fr3 = 0.20, Fr4 = 0.06                                      | Fr2 = 0.69, Fr3 = 0.26, Fr1 = 0.05                                                   |          |
| S <sub>28</sub> | 290 | 0.3540 |  |  | MLCT, LC |
|                 |     |        | Fr1 = 0.53, Fr3 = 0.23, Fr2 = 0.20, Fr4 = 0.04                                      | Fr4 = 0.96, Fr3 = 0.03, Fr2 = 0.02, Fr5 = 0.01                                       |          |
| S <sub>36</sub> | 277 | 0.1403 |  |  | LC, LLCT |
|                 |     |        | Fr4 = 0.52, Fr5 = 0.42, Fr1 = 0.02, Fr2 = 0.02, Fr3 = 0.02                          | Fr5 = 0.44, Fr4 = 0.28, Fr3 = 0.19, Fr2 = 0.10                                       |          |
| S <sub>45</sub> | 265 | 0.2060 |  |  | LC       |
|                 |     |        | Fr3 = 0.45, Fr1 = 0.29, Fr2 = 0.17, Fr4 = 0.06, Fr5 = 0.03                          | Fr3 = 0.73, Fr2 = 0.12, Fr4 = 0.10, Fr5 = 0.03, Fr1 = 0.02                           |          |

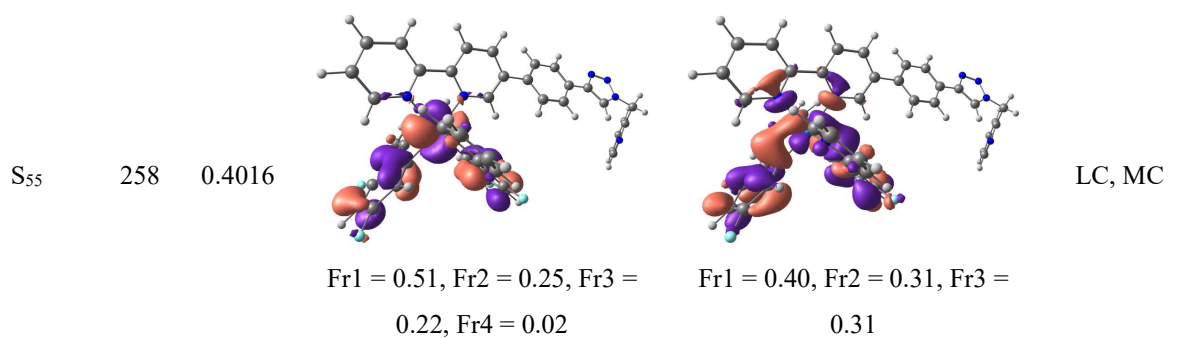

## 5

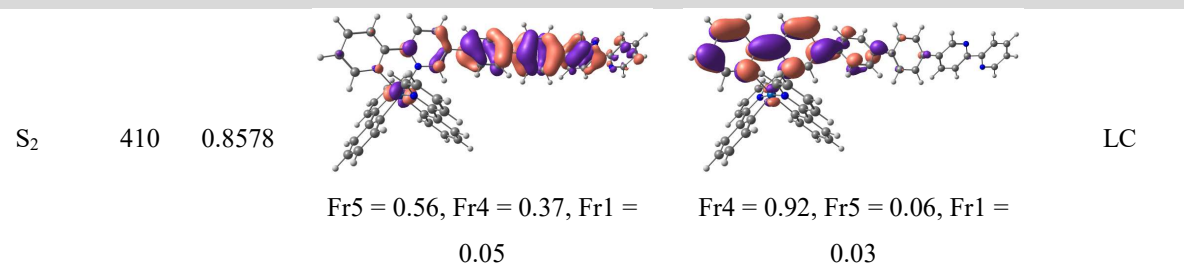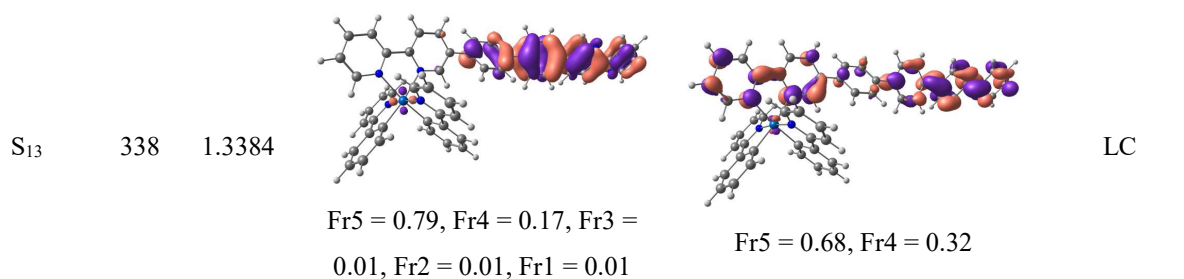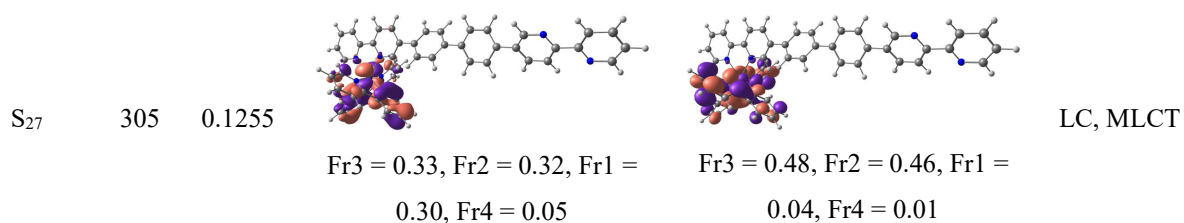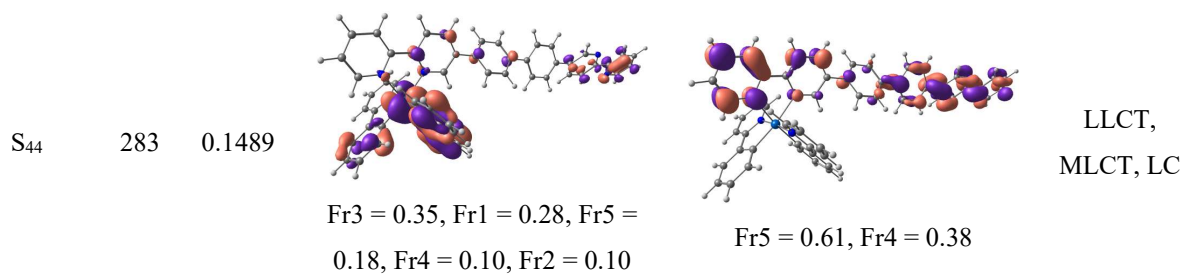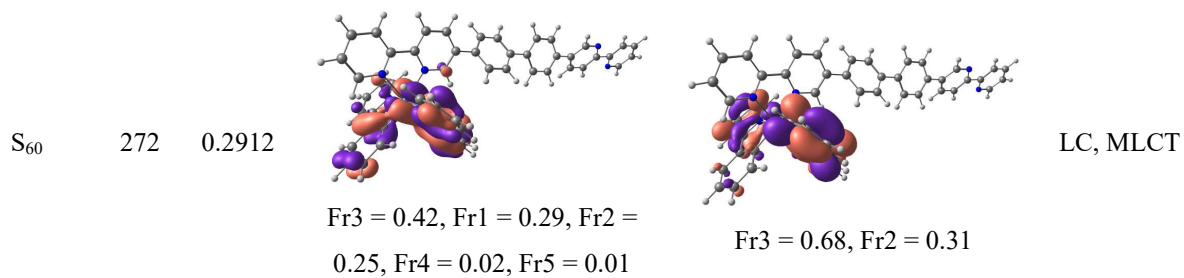



|                 |     |        |                                                                                     |                                                                                      |                |
|-----------------|-----|--------|-------------------------------------------------------------------------------------|--------------------------------------------------------------------------------------|----------------|
| S <sub>74</sub> | 262 | 0.2069 | 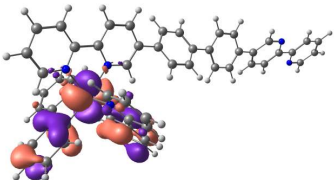   |    | LC, MC         |
|                 |     |        | Fr1 = 0.50, Fr2 = 0.24, Fr3 = 0.24, Fr4 = 0.02                                      | Fr1 = 0.36, Fr3 = 0.31, Fr2 = 0.31, Fr4 = 0.02                                       |                |
| <b>8</b>        |     |        |                                                                                     |                                                                                      |                |
| S <sub>3</sub>  | 398 | 0.1985 |    |    | LC, MLCT       |
|                 |     |        | Fr1 = 0.51, Fr4 = 0.24, Fr3 = 0.09, Fr2 = 0.09, Fr5 = 0.08                          | Fr4 = 0.96, Fr1 = 0.03, Fr5 = 0.01                                                   |                |
| S <sub>6</sub>  | 385 | 0.4987 |    |    | LC, LLCT, MLCT |
|                 |     |        | Fr4 = 0.44, Fr5 = 0.22, Fr2 = 0.14, Fr1 = 0.14, Fr3 = 0.06                          | Fr4 = 0.96, Fr1 = 0.03, Fr5 = 0.02                                                   |                |
| S <sub>23</sub> | 304 | 0.1162 |  |  | LC, MLCT       |
|                 |     |        | Fr3 = 0.34, Fr2 = 0.32, Fr1 = 0.26, Fr4 = 0.07, Fr5 = 0.01                          | Fr2 = 0.48, Fr3 = 0.43, Fr1 = 0.04, Fr4 = 0.04                                       |                |
| S <sub>29</sub> | 293 | 0.3710 |  |  | LC             |
|                 |     |        | Fr4 = 0.79, Fr5 = 0.20, Fr1 = 0.02                                                  | Fr4 = 0.97, Fr1 = 0.03, Fr5 = 0.01                                                   |                |
| S <sub>36</sub> | 282 | 0.1367 |  |  | LLCT, MLCT     |
|                 |     |        | Fr1 = 0.39, Fr3 = 0.28, Fr2 = 0.17, Fr4 = 0.11, Fr5 = 0.05                          | Fr4 = 0.99, Fr1 = 0.02                                                               |                |

|                 |     |        |                                                                                   |                                                                                    |          |
|-----------------|-----|--------|-----------------------------------------------------------------------------------|------------------------------------------------------------------------------------|----------|
| S <sub>47</sub> | 272 | 0.2926 | 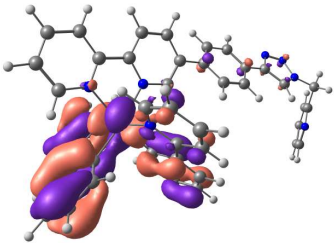 |  | LC, MLCT |
|                 |     |        | Fr2 = 0.41, Fr3 = 0.26, Fr1 = 0.26, Fr4 = 0.06, Fr5 = 0.02                        | Fr2 = 0.84, Fr3 = 0.12, Fr4 = 0.04                                                 |          |
| S <sub>48</sub> | 271 | 0.1170 |  |  | LC, MLCT |
|                 |     |        | Fr4 = 0.34, Fr3 = 0.24, Fr5 = 0.17, Fr1 = 0.14, Fr2 = 0.11                        | Fr3 = 0.68, Fr2 = 0.19, Fr4 = 0.10, Fr5 = 0.03                                     |          |
| S <sub>57</sub> | 262 | 0.1510 |  |  | LC       |
|                 |     |        | Fr4 = 0.63, Fr5 = 0.34, Fr1 = 0.01, Fr2 = 0.01                                    | Fr4 = 0.70, Fr5 = 0.27, Fr3 = 0.02, Fr2 = 0.01                                     |          |

## 6

|                 |     |        |                                                                                     |                                                                                      |          |
|-----------------|-----|--------|-------------------------------------------------------------------------------------|--------------------------------------------------------------------------------------|----------|
| S <sub>3</sub>  | 447 | 0.1084 | 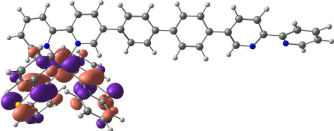 |  | LC, MLCT |
|                 |     |        | Fr2 = 0.36, Fr3 = 0.33, Fr1 = 0.29, Fr4 = 0.01                                      | Fr3 = 0.58, Fr2 = 0.34, Fr1 = 0.09                                                   |          |
| S <sub>5</sub>  | 417 | 0.8185 |  |  | LC       |
|                 |     |        | Fr5 = 0.59, Fr4 = 0.40, Fr1 = 0.01                                                  | Fr4 = 0.93, Fr5 = 0.05, Fr1 = 0.03                                                   |          |
| S <sub>10</sub> | 377 | 0.1340 |  |  | LC       |
|                 |     |        | Fr2 = 0.49, Fr3 = 0.47, Fr1 = 0.03                                                  | Fr2 = 0.65, Fr3 = 0.29, Fr1 = 0.05                                                   |          |

|                 |     |        |                                                                                     |                                                                                      |          |
|-----------------|-----|--------|-------------------------------------------------------------------------------------|--------------------------------------------------------------------------------------|----------|
| S <sub>18</sub> | 337 | 0.7174 | 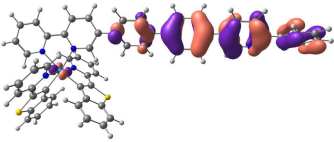   |    | LC, LLCT |
|                 |     |        | Fr5 = 0.83, Fr4 = 0.13, Fr1 = 0.02, Fr3 = 0.02                                      | Fr4 = 0.40, Fr3 = 0.37, Fr5 = 0.20, Fr1 = 0.04                                       |          |
| S <sub>21</sub> | 332 | 0.6597 |    |    | LC, LLCT |
|                 |     |        | Fr5 = 0.61, Fr4 = 0.35, Fr2 = 0.02, Fr3 = 0.01                                      | Fr4 = 0.33, Fr5 = 0.32, Fr3 = 0.19, Fr2 = 0.15, Fr1 = 0.01                           |          |
| S <sub>23</sub> | 329 | 0.1506 |    |    | LC, LLCT |
|                 |     |        | Fr5 = 0.45, Fr4 = 0.29, Fr2 = 0.24, Fr1 = 0.02                                      | Fr2 = 0.83, Fr5 = 0.07, Fr1 = 0.05, Fr4 = 0.05                                       |          |
| S <sub>30</sub> | 316 | 0.1508 |   |   | LC       |
|                 |     |        | Fr5 = 0.61, Fr4 = 0.38                                                              | Fr4 = 0.62, Fr5 = 0.34, Fr3 = 0.04, Fr2 = 0.02                                       |          |
| S <sub>39</sub> | 302 | 0.1655 |  |  | LC, MLCT |
|                 |     |        | Fr1 = 0.59, Fr3 = 0.23, Fr2 = 0.10, Fr4 = 0.07                                      | Fr3 = 0.93, Fr1 = 0.08                                                               |          |
| S <sub>40</sub> | 302 | 0.1739 |  |  | LC, MLCT |
|                 |     |        | Fr1 = 0.60, Fr2 = 0.22, Fr3 = 0.11, Fr4 = 0.07                                      | Fr2 = 0.93, Fr1 = 0.08                                                               |          |
| 9               |     |        |                                                                                     |                                                                                      |          |
| S <sub>3</sub>  | 448 | 0.1075 |  |  | LC, MLCT |
|                 |     |        | Fr2 = 0.37, Fr3 = 0.33, Fr1 = 0.29, Fr4 = 0.01                                      | Fr3 = 0.61, Fr2 = 0.33, Fr1 = 0.09                                                   |          |

|                 |     |        |                                                                                     |                                                                                      |          |
|-----------------|-----|--------|-------------------------------------------------------------------------------------|--------------------------------------------------------------------------------------|----------|
| S <sub>6</sub>  | 399 | 0.6523 | 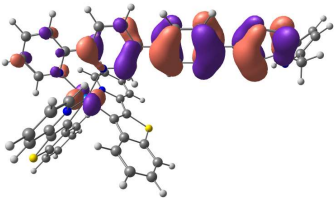   |    | LC       |
|                 |     |        | Fr4 = 0.62, Fr5 = 0.28, Fr1 = 0.07, Fr3 = 0.02, Fr2 = 0.02                          | Fr4 = 0.96, Fr1 = 0.03, Fr5 = 0.02                                                   |          |
| S <sub>10</sub> | 377 | 0.1407 |    |    | LC       |
|                 |     |        | Fr2 = 0.49, Fr3 = 0.48, Fr1 = 0.03                                                  | Fr2 = 0.66, Fr3 = 0.29, Fr1 = 0.05                                                   |          |
| S <sub>15</sub> | 353 | 0.1013 |    |    | LC, MLCT |
|                 |     |        | Fr2 = 0.39, Fr3 = 0.35, Fr1 = 0.25, Fr4 = 0.01                                      | Fr2 = 0.56, Fr3 = 0.40, Fr4 = 0.04, Fr5 = 0.01                                       |          |
| S <sub>17</sub> | 333 | 0.1731 |  |  | LC, MLCT |
|                 |     |        | Fr3 = 0.44, Fr2 = 0.33, Fr1 = 0.21, Fr4 = 0.03                                      | Fr3 = 0.60, Fr2 = 0.35, Fr1 = 0.08                                                   |          |
| S <sub>18</sub> | 330 | 0.1510 |  |  | LC       |
|                 |     |        | Fr3 = 0.66, Fr2 = 0.26, Fr1 = 0.05, Fr4 = 0.02                                      | Fr3 = 0.76, Fr2 = 0.18, Fr1 = 0.07                                                   |          |
| S <sub>27</sub> | 316 | 0.1159 |  |  | LC       |
|                 |     |        | Fr4 = 0.67, Fr5 = 0.27, Fr1 = 0.05, Fr3 = 0.02                                      | Fr4 = 0.93, Fr3 = 0.08, Fr5 = 0.01                                                   |          |

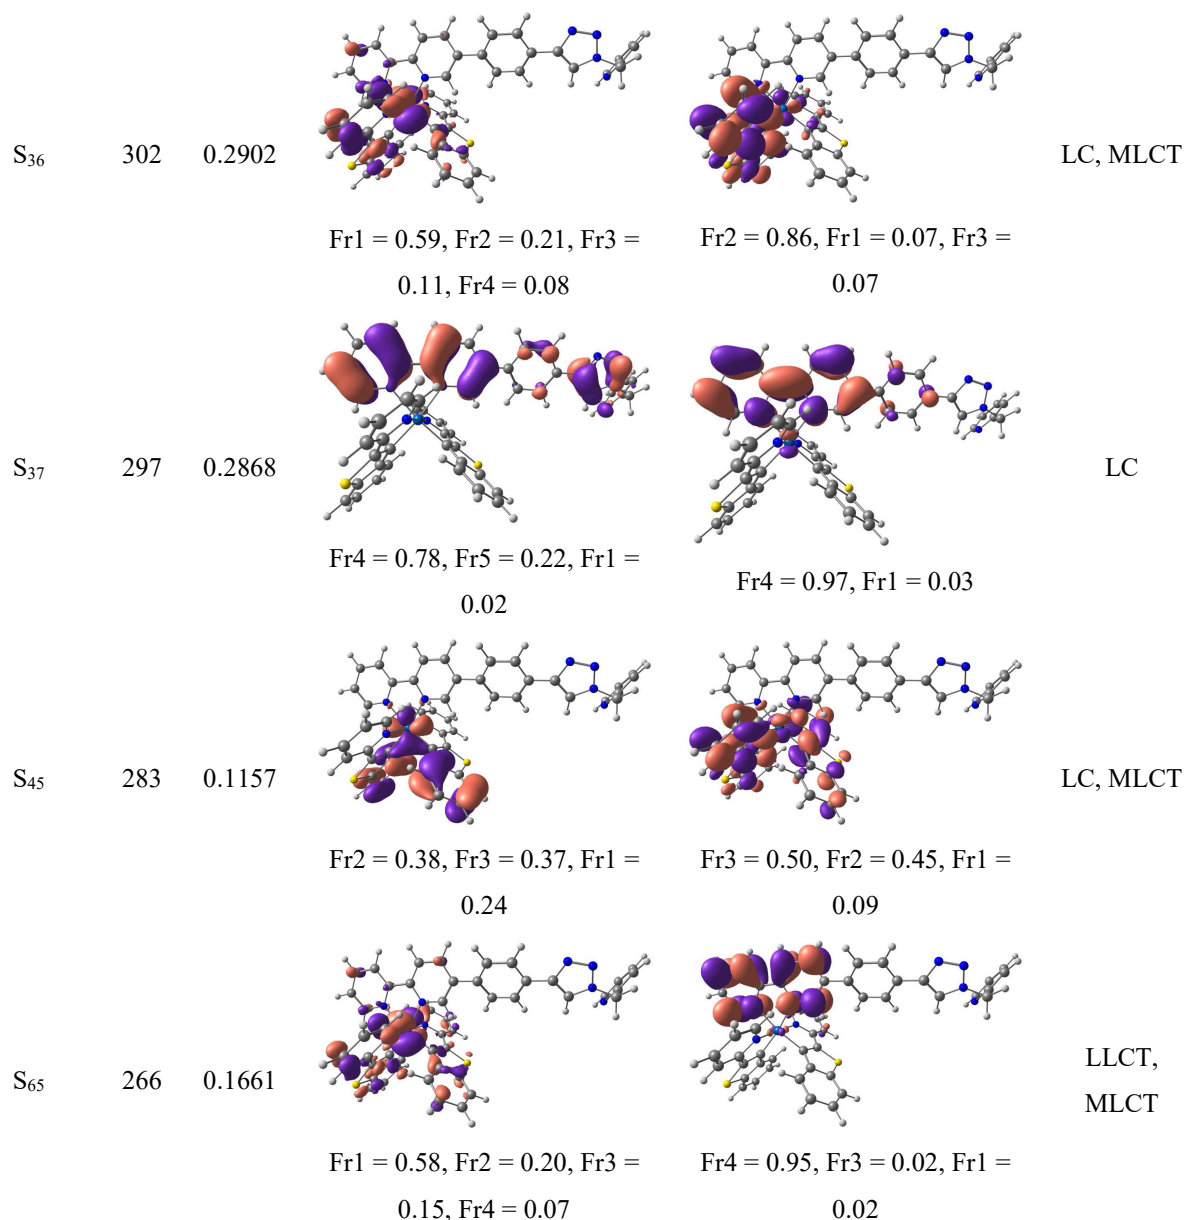

# for fragmentation scheme see Figure S23

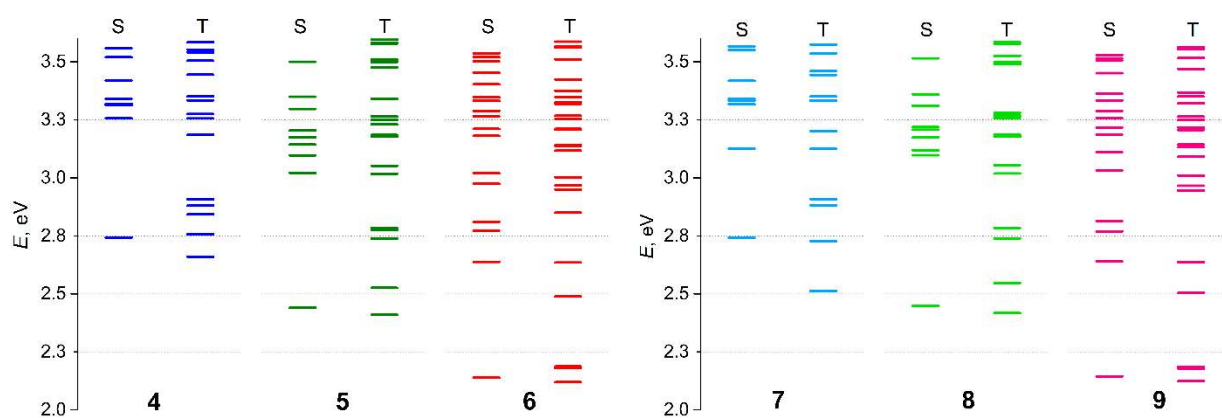

**Figure S26.** Excited state diagrams for 4–9 obtained from TDDFT calculations.

**Table S6.** Natural Transition Orbital analysis of **first triplets** in 4–9.

| Complex | $\Delta E(S_0-T_1)$ ,<br>eV | NTO and its<br>population over fragments <sup>#</sup>                                                                                 | NTO* and its<br>population over fragments <sup>#</sup>                                                                                             | Transition<br>character |
|---------|-----------------------------|---------------------------------------------------------------------------------------------------------------------------------------|----------------------------------------------------------------------------------------------------------------------------------------------------|-------------------------|
| 4       | 2.6594                      | 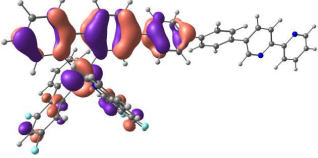<br>Fr4 = 0.60, Fr1 = 0.21, Fr3 = 0.11, Fr2 = 0.08   | <br>Fr4 = 0.98, Fr1 = 0.03                                       | LC, MLCT                |
| 7       | 2.5122                      | <br>Fr4 = 0.81, Fr5 = 0.14, Fr1 = 0.04, Fr3 = 0.01   | <br>Fr4 = 0.95, Fr5 = 0.04, Fr1 = 0.02                           | LC                      |
| 5       | 2.4094                      | <br>Fr1 = 0.43, Fr3 = 0.25, Fr2 = 0.24, Fr4 = 0.07  | <br>Fr4 = 0.96, Fr1 = 0.04, Fr5 = 0.02                          | LLCT,<br>MLCT           |
| 8       | 2.4168                      | <br>Fr1 = 0.43, Fr3 = 0.25, Fr2 = 0.24, Fr4 = 0.08 | <br>Fr4 = 0.97, Fr1 = 0.04, Fr5 = 0.01                         | LLCT,<br>MLCT           |
| 6       | 2.1991                      | <br>Fr3 = 0.38, Fr2 = 0.34, Fr1 = 0.27, Fr4 = 0.01 | <br>Fr4 = 0.88, Fr3 = 0.04, Fr2 = 0.03, Fr1 = 0.03, Fr5 = 0.01 | LLCT,<br>MLCT           |
| 9       | 2.1240                      | <br>Fr3 = 0.39, Fr2 = 0.34, Fr1 = 0.26, Fr4 = 0.01 | <br>Fr4 = 0.85, Fr3 = 0.06, Fr2 = 0.04, Fr1 = 0.03, Fr5 = 0.01 | LLCT,<br>MLCT           |

<sup>#</sup> for fragmentation scheme see Figure S23

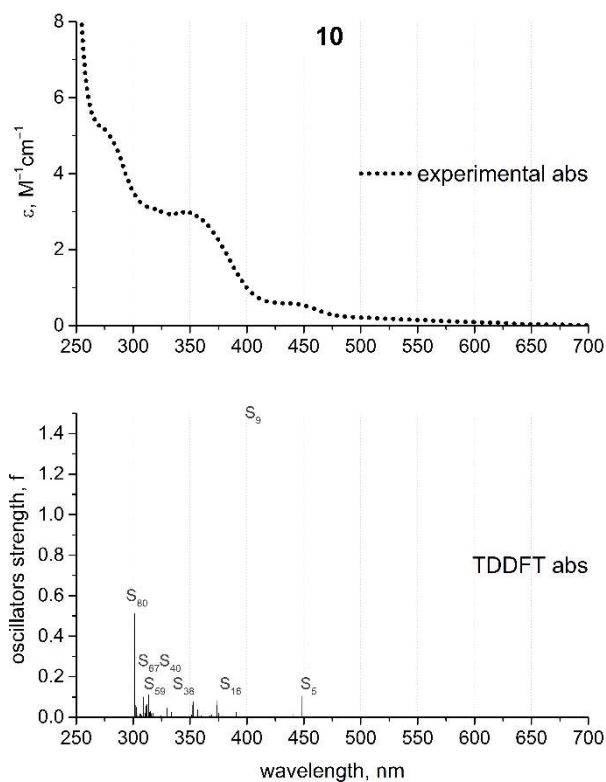

**Figure S27.** TDDFT spectra of **10**. Singlets with  $f > 0.1$  are indicated. Experimental spectra are given for comparison.

**Table S7.** Natural Transition Orbital analysis of **singlets** with oscillator strength  $f > 0.1$  in complex **10**.

| Excited state | $\lambda$ , nm | $f$    | NTO and its population over fragments <sup>#</sup>                                                                                    | NTO* and its population over fragments <sup>#</sup>                                                                                    | Transition character |
|---------------|----------------|--------|---------------------------------------------------------------------------------------------------------------------------------------|----------------------------------------------------------------------------------------------------------------------------------------|----------------------|
| $S_5$         | 448            | 0.1015 | 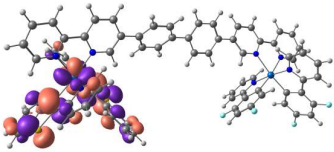<br>Fr2 = 0.39, Fr3 = 0.31, Fr1 = 0.29, Fr4 = 0.01 | <br>Fr3 = 0.69, Fr2 = 0.24, Fr1 = 0.09             | LC, MLCT             |
| $S_9$         | 403            | 1.4490 | <br>Fr4 = 0.49, Fr5 = 0.46, Fr1 = 0.03, Fr6 = 0.01 | <br>Fr4 = 0.53, Fr5 = 0.45, Fr1 = 0.01, Fr6 = 0.01 | LC                   |

|                 |     |        |                                                                                     |                                                                                      |          |
|-----------------|-----|--------|-------------------------------------------------------------------------------------|--------------------------------------------------------------------------------------|----------|
| S <sub>16</sub> | 377 | 0.1217 | 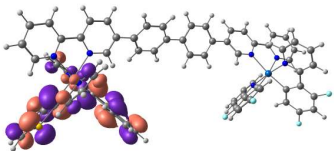   |    | LC       |
|                 |     |        | Fr2 = 0.48, Fr3 = 0.48, Fr1 = 0.03, Fr4 = 0.01                                      | Fr2 = 0.74, Fr3 = 0.20, Fr1 = 0.05                                                   |          |
| S <sub>38</sub> | 333 | 0.1685 |    |    | LC, MLCT |
|                 |     |        | Fr2 = 0.52, Fr3 = 0.27, Fr1 = 0.20                                                  | Fr2 = 0.49, Fr3 = 0.45, Fr1 = 0.08                                                   |          |
| S <sub>40</sub> | 330 | 0.1339 |    |    | LC       |
|                 |     |        | Fr2 = 0.52, Fr3 = 0.40, Fr1 = 0.08                                                  | Fr3 = 0.56, Fr2 = 0.40, Fr1 = 0.04                                                   |          |
| S <sub>59</sub> | 314 | 0.1115 |   |   | LC, LLCT |
|                 |     |        | Fr5 = 0.51, Fr4 = 0.39, Fr8 = 0.05, Fr6 = 0.03                                      | Fr5 = 0.49, Fr7 = 0.28, Fr4 = 0.17, Fr2 = 0.04, Fr6 = 0.02                           |          |
| S <sub>67</sub> | 309 | 0.1002 |  |  | LC, MLCT |
|                 |     |        | Fr8 = 0.35, Fr6 = 0.31, Fr7 = 0.30, Fr5 = 0.04                                      | Fr8 = 0.59, Fr7 = 0.33, Fr6 = 0.06                                                   |          |
| S <sub>80</sub> | 301 | 0.5113 |  |  | LC       |
|                 |     |        | Fr4 = 0.43, Fr5 = 0.40, Fr6 = 0.07, Fr8 = 0.04, Fr1 = 0.03, Fr2 = 0.01              | Fr4 = 0.58, Fr5 = 0.40, Fr1 = 0.02, Fr6 = 0.01                                       |          |

# for fragmentation scheme see Figure S23



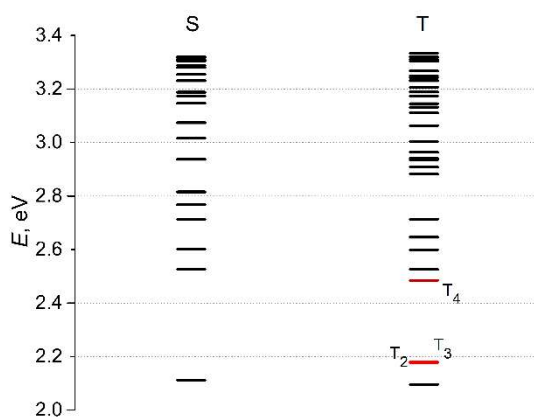

**Figure S28.** Excited state diagrams for **10** obtained from TDDFT calculations. Degenerated  $T_2$  and  $T_3$  states located on pybt ligands and  $T_4$  state located on  $N^{\wedge}N$  ligand are indicated.

**Table S8.** Natural Transition Orbital analysis of **low-energy excited states** in complex **10**.

| Excited state | $\Delta E$ , eV | NTO and its population over fragments <sup>#</sup>                                                                                       | NTO* and its population over fragments <sup>#</sup>                                                                                                   | Transition character |
|---------------|-----------------|------------------------------------------------------------------------------------------------------------------------------------------|-------------------------------------------------------------------------------------------------------------------------------------------------------|----------------------|
| $T_1$         | 2.0960          | 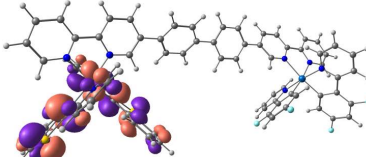<br>Fr3 = 0.36, Fr2 = 0.36, Fr1 = 0.27,<br>Fr4 = 0.01 | <br>Fr4 = 0.90, Fr5 = 0.04, Fr1 = 0.03,<br>Fr2 = 0.02, Fr3 = 0.02 | LLCT,<br>MLCT        |
| $S_1$         | 2.1120          | <br>Fr2 = 0.37, Fr3 = 0.35, Fr1 = 0.27,<br>Fr4 = 0.01 | <br>Fr4 = 0.94, Fr5 = 0.04, Fr1 = 0.03                            | LLCT,<br>MLCT        |
| $T_2$         | 2.1778          | <br>Fr2 = 0.53, Fr3 = 0.29, Fr1 = 0.17                | <br>Fr2 = 0.61, Fr3 = 0.35, Fr1 = 0.05                            | LC, MLCT             |

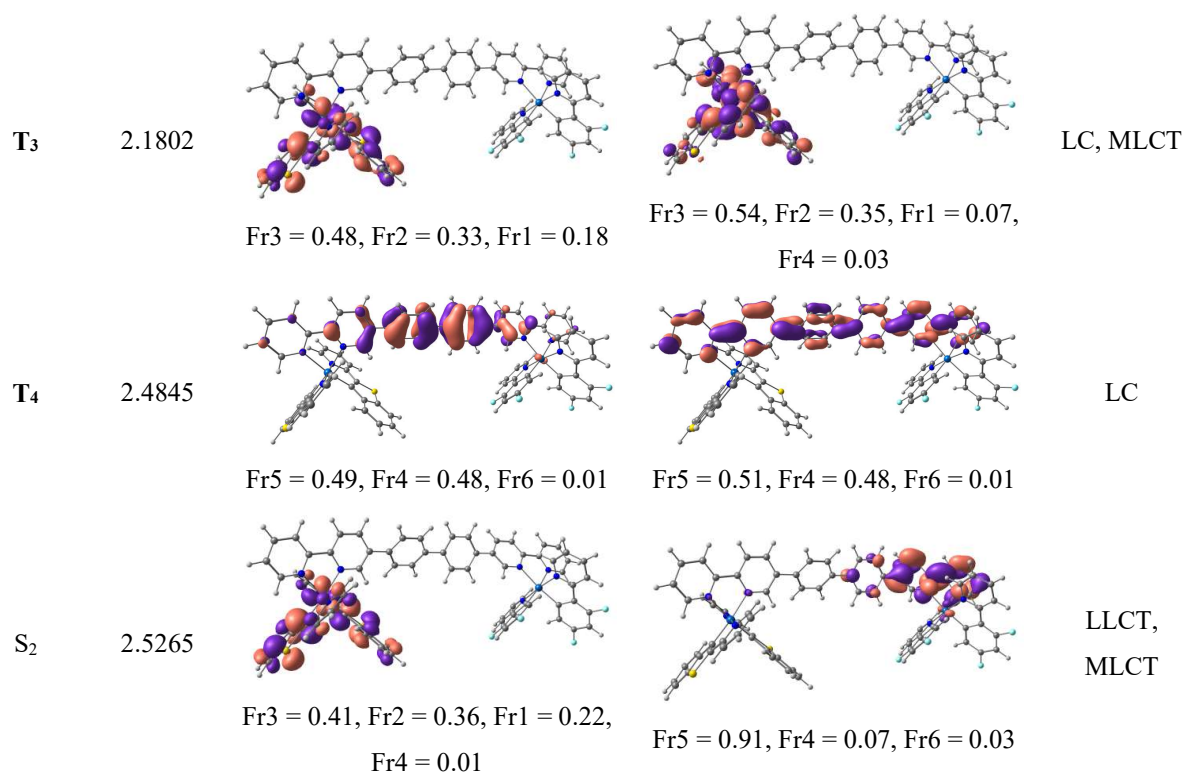

# for fragmentation scheme see Figure S23

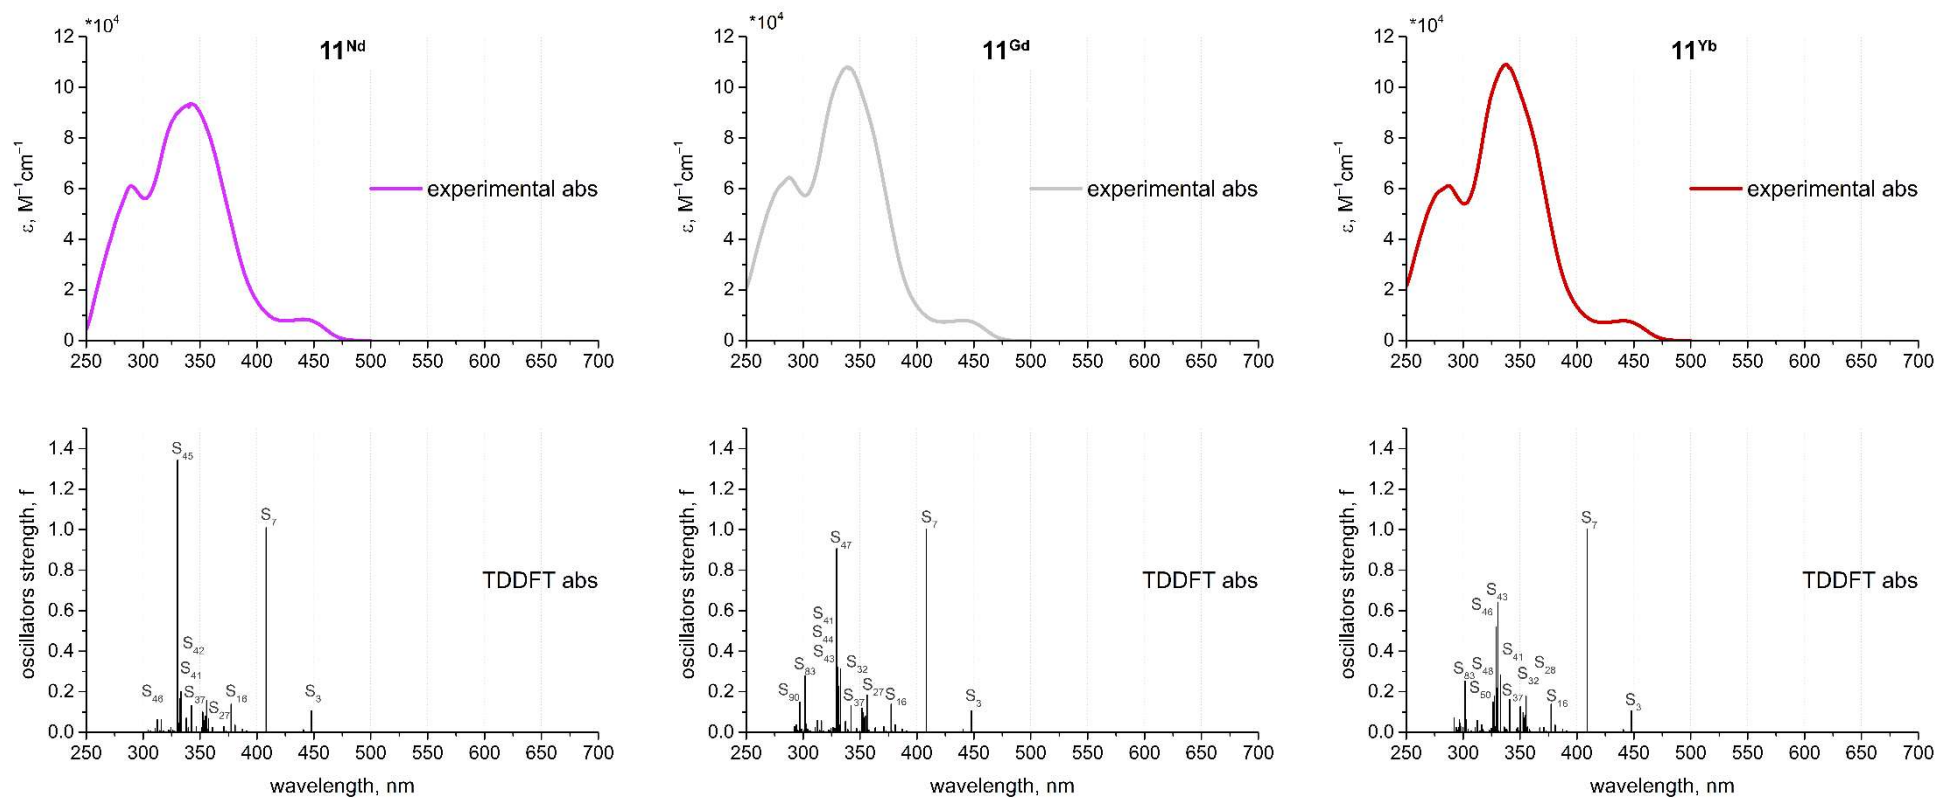

**Figure S29.** TDDFT spectra of  $11\text{Ln}$  (Ln = Nd, Gd, Yb). Singlets with  $f > 0.1$  are indicated. Experimental spectra are given for comparison.

**Table S9.** Natural Transition Orbital analysis of **singlets** with oscillator strength  $f > 0.1$  in  $11^{Ln}$  (Ln = Nd, Gd, Yb).

| Excited state               | $\lambda$ , nm | $f$    | NTO and its population over fragments <sup>#</sup>                                                                                    | NTO* and its population over fragments <sup>#</sup>                                                                                    | Transition character |
|-----------------------------|----------------|--------|---------------------------------------------------------------------------------------------------------------------------------------|----------------------------------------------------------------------------------------------------------------------------------------|----------------------|
| <b><math>11^{Nd}</math></b> |                |        |                                                                                                                                       |                                                                                                                                        |                      |
| S <sub>3</sub>              | 448            | 0.1045 | 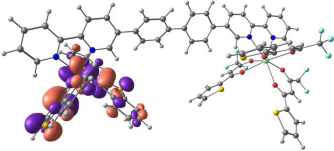<br>Fr2 = 0.37, Fr3 = 0.33, Fr1 = 0.29, Fr4 = 0.01   | <br>Fr3 = 0.61, Fr2 = 0.32, Fr1 = 0.09               | LC, MLCT             |
| S <sub>7</sub>              | 408            | 1.0084 | <br>Fr5 = 0.51, Fr4 = 0.46, Fr1 = 0.02               | <br>Fr4 = 0.88, Fr5 = 0.10, Fr1 = 0.03               | LC                   |
| S <sub>16</sub>             | 377            | 0.1377 | <br>Fr2 = 0.48, Fr3 = 0.48, Fr1 = 0.03              | <br>Fr2 = 0.64, Fr3 = 0.29, Fr1 = 0.05, Fr4 = 0.01  | LC                   |
| S <sub>27</sub>             | 356            | 0.1554 | <br>Fr5 = 0.46, Fr9 = 0.32, Fr4 = 0.19, Fr7 = 0.02 | <br>Fr7 = 0.48, Fr5 = 0.26, Fr8 = 0.20, Fr4 = 0.04 | LC, LLCT             |
| S <sub>37</sub>             | 343            | 0.1318 | <br>Fr9 = 0.82, Fr7 = 0.13, Fr6 = 0.03, Fr8 = 0.01 | <br>Fr9 = 0.69, Fr8 = 0.19, Fr7 = 0.11, Fr5 = 0.02 | LC                   |
| S <sub>41</sub>             | 333            | 0.1991 | <br>Fr3 = 0.43, Fr2 = 0.34, Fr1 = 0.22, Fr4 = 0.01 | <br>Fr5 = 0.57, Fr4 = 0.39, Fr6 = 0.01             | LLCT, MLCT           |

|                 |     |        |                                                                                   |                                                                                    |          |
|-----------------|-----|--------|-----------------------------------------------------------------------------------|------------------------------------------------------------------------------------|----------|
| S <sub>42</sub> | 333 | 0.1655 | 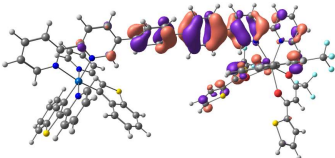 |  | LLCT, LC |
|                 |     |        | Fr5 = 0.52, Fr4 = 0.22, Fr7 = 0.15, Fr9 = 0.08, Fr8 = 0.03                        | Fr8 = 0.67, Fr7 = 0.26, Fr9 = 0.03, Fr5 = 0.01                                     |          |
| S <sub>45</sub> | 330 | 1.3418 |  |  | LC       |
|                 |     |        | Fr8 = 0.78, Fr9 = 0.13, Fr5 = 0.05, Fr4 = 0.02                                    | Fr8 = 0.83, Fr9 = 0.14, Fr5 = 0.02, Fr7 = 0.01                                     |          |
| S <sub>46</sub> | 330 | 0.2098 |  |  | LC       |
|                 |     |        | Fr3 = 0.67, Fr2 = 0.27, Fr1 = 0.05                                                | Fr3 = 0.66, Fr2 = 0.30, Fr1 = 0.04                                                 |          |

### 11<sup>Gd</sup>

|                 |     |        |                                                                                     |                                                                                      |          |
|-----------------|-----|--------|-------------------------------------------------------------------------------------|--------------------------------------------------------------------------------------|----------|
| S <sub>3</sub>  | 448 | 0.1039 | 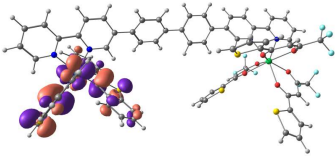 |  | LC, MLCT |
|                 |     |        | Fr2 = 0.37, Fr3 = 0.32, Fr1 = 0.29, Fr4 = 0.01                                      | Fr3 = 0.63, Fr2 = 0.30, Fr1 = 0.09                                                   |          |
| S <sub>7</sub>  | 408 | 1.0026 |  |  | LC       |
|                 |     |        | Fr5 = 0.51, Fr4 = 0.46, Fr1 = 0.02                                                  | Fr4 = 0.89, Fr5 = 0.09, Fr1 = 0.03                                                   |          |
| S <sub>16</sub> | 377 | 0.1377 |  |  | LC       |
|                 |     |        | Fr2 = 0.48, Fr3 = 0.48, Fr1 = 0.03, Fr4 = 0.01                                      | Fr2 = 0.66, Fr3 = 0.27, Fr1 = 0.05, Fr4 = 0.01                                       |          |

|                 |     |        |                                                                                     |                                                                                      |          |
|-----------------|-----|--------|-------------------------------------------------------------------------------------|--------------------------------------------------------------------------------------|----------|
| S <sub>27</sub> | 356 | 0.1838 | 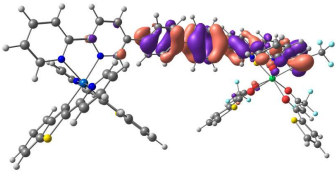   |    | LC, LLCT |
|                 |     |        | Fr5 = 0.50, Fr8 = 0.27, Fr4 = 0.20, Fr7 = 0.03                                      | Fr5 = 0.54, Fr7 = 0.27, Fr4 = 0.10, Fr9 = 0.08, Fr6 = 0.02                           |          |
| S <sub>32</sub> | 352 | 0.1196 |    |    | LLCT, LC |
|                 |     |        | Fr8 = 0.66, Fr5 = 0.17, Fr4 = 0.08, Fr7 = 0.05, Fr6 = 0.02, Fr9 = 0.02              | Fr5 = 0.82, Fr4 = 0.14, Fr6 = 0.02                                                   |          |
| S <sub>37</sub> | 342 | 0.1302 |    |    | LC       |
|                 |     |        | Fr8 = 0.80, Fr7 = 0.14, Fr6 = 0.03, Fr5 = 0.02, Fr4 = 0.01                          | Fr8 = 0.79, Fr9 = 0.13, Fr7 = 0.06, Fr5 = 0.02                                       |          |
| S <sub>41</sub> | 333 | 0.3107 |  |  | LC, MLCT |
|                 |     |        | Fr2 = 0.43, Fr3 = 0.36, Fr1 = 0.19, Fr4 = 0.02, Fr5 = 0.01                          | Fr3 = 0.51, Fr2 = 0.43, Fr1 = 0.08                                                   |          |
| S <sub>43</sub> | 331 | 0.2249 |  |  | LLCT, LC |
|                 |     |        | Fr5 = 0.46, Fr7 = 0.25, Fr4 = 0.19, Fr8 = 0.08, Fr9 = 0.02                          | Fr9 = 0.60, Fr7 = 0.34, Fr8 = 0.04, Fr5 = 0.01                                       |          |
| S <sub>44</sub> | 330 | 0.3216 |  |  | LC, LLCT |
|                 |     |        | Fr7 = 0.43, Fr5 = 0.33, Fr4 = 0.14, Fr9 = 0.08, Fr8 = 0.01                          | Fr9 = 0.54, Fr7 = 0.39, Fr5 = 0.04, Fr8 = 0.02, Fr4 = 0.01                           |          |

|                 |     |        |                                                                                    |                                                                                    |                |
|-----------------|-----|--------|------------------------------------------------------------------------------------|------------------------------------------------------------------------------------|----------------|
| S <sub>47</sub> | 329 | 0.9061 | 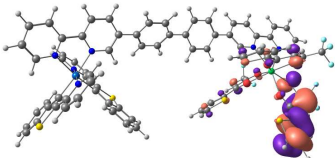  |  | LC             |
|                 |     |        | Fr9 = 0.82, Fr8 = 0.09, Fr7 = 0.06, Fr5 = 0.02                                     | Fr9 = 0.86, Fr7 = 0.08, Fr8 = 0.05, Fr5 = 0.02                                     |                |
| S <sub>83</sub> | 302 | 0.2795 |   |  | LC, MLCT       |
|                 |     |        | Fr1 = 0.58, Fr2 = 0.21, Fr3 = 0.13, Fr4 = 0.07                                     | Fr2 = 0.79, Fr3 = 0.13, Fr1 = 0.06                                                 |                |
| S <sub>90</sub> | 297 | 0.1478 |   |  | LC, LLCT, MLCT |
|                 |     |        | Fr5 = 0.48, Fr4 = 0.28, Fr1 = 0.12, Fr3 = 0.04, Fr8 = 0.04, Fr7 = 0.03, Fr2 = 0.01 | Fr5 = 0.71, Fr7 = 0.13, Fr4 = 0.13, Fr6 = 0.03, Fr9 = 0.01                         |                |

11<sup>Yb</sup>

|                 |     |        |                                                                                     |                                                                                      |          |
|-----------------|-----|--------|-------------------------------------------------------------------------------------|--------------------------------------------------------------------------------------|----------|
| S <sub>3</sub>  | 448 | 0.1042 | 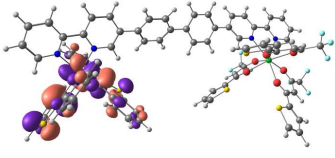 |  | LC, MLCT |
|                 |     |        | Fr2 = 0.37, Fr3 = 0.32, Fr1 = 0.29, Fr4 = 0.01                                      | Fr3 = 0.62, Fr2 = 0.31, Fr1 = 0.09                                                   |          |
| S <sub>7</sub>  | 409 | 1.0003 |  |  | LC       |
|                 |     |        | Fr5 = 0.51, Fr4 = 0.45, Fr1 = 0.02                                                  | Fr4 = 0.89, Fr5 = 0.09, Fr1 = 0.03                                                   |          |
| S <sub>16</sub> | 377 | 0.1380 |  |  | LC       |
|                 |     |        | Fr2 = 0.48, Fr3 = 0.48, Fr1 = 0.03, Fr4 = 0.01                                      | Fr2 = 0.66, Fr3 = 0.28, Fr1 = 0.05, Fr4 = 0.01                                       |          |

|                 |     |        |                                                                                     |                                                                                      |          |
|-----------------|-----|--------|-------------------------------------------------------------------------------------|--------------------------------------------------------------------------------------|----------|
| S <sub>28</sub> | 355 | 0.1766 | 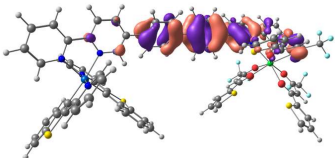   |    | LC, LLCT |
|                 |     |        | Fr5 = 0.62, Fr4 = 0.25, Fr7 = 0.12                                                  | Fr5 = 0.64, Fr8 = 0.21, Fr4 = 0.12, Fr9 = 0.02                                       |          |
| S <sub>32</sub> | 350 | 0.1258 |    |    | LLCT, LC |
|                 |     |        | Fr7 = 0.67, Fr5 = 0.17, Fr4 = 0.08, Fr8 = 0.06, Fr6 = 0.01, Fr9 = 0.01              | Fr5 = 0.83, Fr4 = 0.14                                                               |          |
| S <sub>37</sub> | 341 | 0.1603 |    |    | LC       |
|                 |     |        | Fr7 = 0.70, Fr8 = 0.21, Fr5 = 0.05, Fr4 = 0.02, Fr6 = 0.02                          | Fr7 = 0.93, Fr5 = 0.04, Fr8 = 0.01                                                   |          |
| S <sub>41</sub> | 333 | 0.2828 |  |  | LC, MLCT |
|                 |     |        | Fr2 = 0.41, Fr3 = 0.36, Fr1 = 0.19, Fr4 = 0.02, Fr5 = 0.01                          | Fr3 = 0.52, Fr2 = 0.43, Fr1 = 0.08                                                   |          |
| S <sub>43</sub> | 330 | 0.6382 |  |  | LLCT, LC |
|                 |     |        | Fr8 = 0.53, Fr5 = 0.29, Fr4 = 0.11, Fr7 = 0.04                                      | Fr8 = 0.54, Fr9 = 0.39, Fr3 = 0.03, Fr7 = 0.02, Fr5 = 0.01                           |          |
| S <sub>46</sub> | 329 | 0.5194 |  |  | LLCT     |
|                 |     |        | Fr5 = 0.63, Fr4 = 0.21, Fr9 = 0.07, Fr8 = 0.05, Fr7 = 0.03                          | Fr9 = 0.75, Fr8 = 0.19, Fr4 = 0.02, Fr7 = 0.02, Fr5 = 0.01                           |          |



|                 |     |        |                                                                                                                                                             |                                                                                                                                      |                |
|-----------------|-----|--------|-------------------------------------------------------------------------------------------------------------------------------------------------------------|--------------------------------------------------------------------------------------------------------------------------------------|----------------|
| S <sub>48</sub> | 327 | 0.1772 | 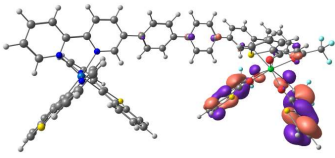<br>Fr9 = 0.56, Fr8 = 0.28, Fr5 = 0.06, Fr7 = 0.05, Fr4 = 0.03, Fr6 = 0.02 | <br>Fr9 = 0.73, Fr8 = 0.23, Fr7 = 0.02             | LC             |
| S <sub>50</sub> | 326 | 0.1480 | <br>Fr5 = 0.31, Fr4 = 0.29, Fr1 = 0.14, Fr3 = 0.13, Fr2 = 0.13             | <br>Fr4 = 0.94, Fr5 = 0.03, Fr1 = 0.03             | LC, LLCT, MLCT |
| S <sub>83</sub> | 302 | 0.2505 | <br>Fr1 = 0.59, Fr2 = 0.20, Fr3 = 0.13, Fr4 = 0.07                         | <br>Fr2 = 0.80, Fr3 = 0.12, Fr1 = 0.07, Fr4 = 0.01 | LC, MLCT       |

# for fragmentation scheme see Figure S23

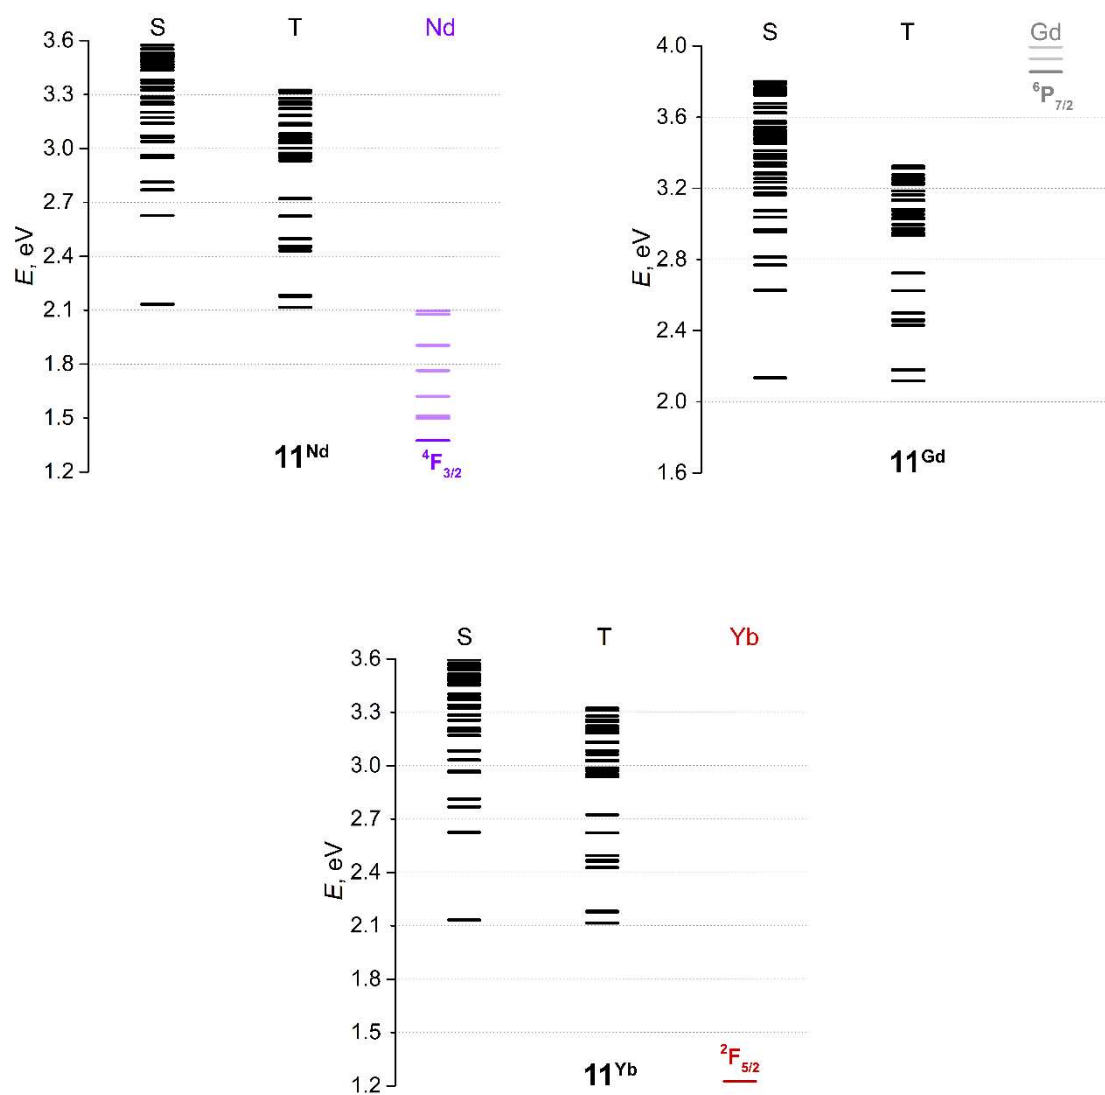

**Figure S30.** Excited state diagrams for  $11^{\text{Ln}}$  ( $\text{Ln} = \text{Nd, Gd, Yb}$ ) obtained from TDDFT calculations. Energy levels of lanthanides are shown in colour.

**Table S10.** Natural Transition Orbital analysis of **first triplets** in **11<sup>Ln</sup>** (Ln = Nd, Gd, Yb).

| Complex                       | $\Delta E(S_0-T_1)$ ,<br>eV | NTO and its<br>population over fragments <sup>#</sup>                                                                                   | NTO* and its<br>population over fragments <sup>#</sup>                                                                                               | Transition<br>character |
|-------------------------------|-----------------------------|-----------------------------------------------------------------------------------------------------------------------------------------|------------------------------------------------------------------------------------------------------------------------------------------------------|-------------------------|
| <b>Ir(pybt)1<sup>Nd</sup></b> | 2.1153                      | 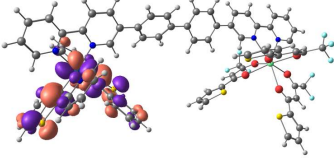<br>Fr3 = 0.37, Fr2 = 0.35, Fr1 =<br>0.27, Fr4 = 0.01  | <br>Fr4 = 0.89, Fr1 = 0.03, Fr3 =<br>0.03, Fr2 = 0.03, Fr5 = 0.02  | LLCT, MLCT              |
| <b>Ir(pybt)1<sup>Gd</sup></b> | 2.1167                      | <br>Fr3 = 0.37, Fr2 = 0.34, Fr1 =<br>0.27, Fr4 = 0.01  | <br>Fr4 = 0.89, Fr3 = 0.03, Fr1 =<br>0.03, Fr2 = 0.03, Fr5 = 0.02  | LLCT, MLCT              |
| <b>Ir(pybt)1<sup>Yb</sup></b> | 2.1150                      | <br>Fr3 = 0.37, Fr2 = 0.34, Fr1 =<br>0.27, Fr4 = 0.01 | <br>Fr4 = 0.90, Fr1 = 0.03, Fr3 =<br>0.03, Fr2 = 0.03, Fr5 = 0.02 | LLCT, MLCT              |

<sup>#</sup> for fragmentation scheme see Figure S23

## References

- 1 V. N. Kozhevnikov, O. V. Shabunina, D. S. Kopchuk, M. M. Ustinova, B. König and D. N. Kozhevnikov, *Tetrahedron*, 2008, **64**, 8963–8973.
- 2 V. S. Sastri, J.-C. Bünzli, V. R. Rao, G. V. S. Rayudu and J. R. Perumareddi, in *Modern Aspects of Rare Earths and Their Complexes*, Elsevier, 2003, pp. 569–731.
